# Supplementary material for: Targeting UBC9-mediated protein hyper-SUMOylation in cystic cholangiocytes halts polycystic liver disease in experimental models
Source: PubMed Central journal article supplement (PMC8157180; doi:10.1016/j.jhep.2020.09.010), 2020-09-17
Supplement: NIHMS1666894-supplement-Suppl_Material_1.pdf [file NIHMS1666894-supplement-Suppl_Material_1.pdf]

# Targeting UBC9-mediated Protein Hyper-SUMOylation in Cystic Cholangiocytes Halts Polycystic Liver Disease in Experimental Models

Pui Y. Lee-Law,<sup>1,2\*</sup> Paula Olaizola,<sup>1\*</sup> Francisco J. Caballero-Camino,<sup>1</sup> Laura Izquierdo-Sánchez,<sup>1,3</sup> Pedro M. Rodrigues,<sup>1</sup> Alvaro Santos-Laso,<sup>1</sup> Mikel Azkargorta,<sup>3,4</sup> Felix Elortza,<sup>3,4</sup> Maria L. Martinez-Chantar,<sup>3,5</sup> Maria J. Perugorria,<sup>1,3</sup> Patricia Aspichueta,<sup>6,7</sup> Marco Marzioni,<sup>8</sup> Nicholas F. LaRusso,<sup>9</sup> Luis Bujanda,<sup>1,3</sup> Joost P.H. Drenth,<sup>2,\$</sup> and Jesus M. Banales.<sup>1,3,10,\$</sup>

## Table of contents

|                             |    |
|-----------------------------|----|
| Materials and Methods ..... | 1  |
| Supplementary Figures ..... | 9  |
| Supplementary Tables .....  | 20 |
| References .....            | 32 |

## **Materials and Methods**

### *RNA isolation and gene expression*

RNA isolation was performed in human and rat liver samples and cell culture using TRI Reagent (Sigma). Subsequently, 1 µg of RNA isolated from human liver samples were reverse transcribed using the SuperScript VILO cDNA Synthesis Kit (Invitrogen) in a Veriti Thermal Cycler (Applied Biosystems). On the other hand, cells and rat liver samples were reverse transcribed using a mixture of DNase I, Amplification Grade (Invitrogen), M-MLV Reverse Transcriptase (Invitrogen), RNaseOUT Recombinant Ribonuclease Inhibitor (Invitrogen), Random Primers (Invitrogen) and illustra Solution dNTPs (GE Life Sciences). The gene expression (mRNA) of specific primers sequences (Supplementary CTAT Table and Supplementary Table 2) was determined by real-time quantitative polymerase chain reaction (qPCR) using iQ SYBR Green Supermix (Bio-Rad) in a CFX96 Touch Real-Time PCR Detection System as previously described.[1]

### *Animals and treatment*

The well-defined PCK rat (commercially available by Charles River Laboratory) carries a spontaneous splicing mutation (IVS35-2A→T) in the *polycystic kidney and hepatic disease 1 (PKHD1)* orthologous gene, responsible for an ARPKD/congenital hepatic fibrosis phenotype.[2] The PCK rat represents an accurate and useful animal model of slowly progressive PLD phenotype.[3] The liver phenotype in PCK rats is characterized by extensive cyst formation, as the majority disconnect from the bile ducts throughout time, and hepatomegaly with unaltered liver parenchyma.[4] Hepato-renal cystogenesis and fibrosis gradually develop after 8 weeks of age in both male and female PCK rats, and concurrently elevated serum levels of blood urea nitrogen, creatinine, bilirubin, cholesterol,

triglycerides and alkaline phosphatase are observed.[3] Although the pathologies become evident after 25 weeks of age, there is considerable variability.

In this study, PCK rats (8 weeks of age) were grouped in: 1) non-treated (n=14) and 2) treated (n=12) with S-adenosyl-L-methionine disulfate p-toluenesulfonate (S-AMe, kindly provided by Gnosis S.p.A., Derio, Italy). Every group had 50% male and 50% female PCK rats, as published studies demonstrated no significant differences between both sexes (Supplementary Figure 1).[5–8] S-AMe dosage was set at 20 mg/kg/day, as published clinical trials in liver diseases showed no severe adverse events.[9,10] S-AMe dissolved easily in drinking water of the animals, thus based on daily weight monitoring, S-AMe was administered by oral gavage with an orogastric canula for 5 months (on a 5-day-on/2-day-off schedule). As negative control of the disease, eight-weeks old wild-type (Sprague-Dawley, Charles River Laboratory) rats (n=8) were maintained in parallel. During the entire study, all animals were weighed weekly, and had *ad libitum* access to food (standard diet) and water.

At the beginning, and after 6 weeks, 12 weeks and at the sacrifice, blood samples were collected from every animal. Levels of serum biochemical markers such as alkaline phosphatase (ALP), aspartate aminotransferase (AST), alanine aminotransferase (ALT), albumin, blood urea and total protein were measured. For every blood collection, the animals were anesthetized with isoflurane (2.5% in inhaling oxygen, at a flow of 0.3 L/min). Non-treated and treated rats were sacrificed after 5 months, and blood, bile, liver, kidneys and spleen were collected. The harvested tissues were stained with hematoxylin/eosin or picosirius red, for measuring hepatorenal cysts and liver fibrosis, respectively.

Hepatorenal cystogenesis and liver fibrosis were quantitated using ImageJ software (National Institutes of Health, USA).[11]

All animal experimental procedures were approved by the *Animal Experimentation Ethics Committee* of Biodonostia Health Research Institute (CEEA17/007).

### *Immunoblotting*

Whole cells lysates of cultured human cholangiocytes were extracted with radio-immunoprecipitation (RIPA) lysis buffer and freshly prepared 20 mM N-ethylmaleimide (NEM, isopeptidase inhibitor preventing protein deSUMOylation).[12] Changes in small ubiquitin like modifier 1 (SUMO1) and SUMO1-conjugated proteins, UBC9, acetylated  $\alpha$ -tubulin, p62 and ubiquitin-conjugated proteins were analyzed by western blotting (WB) using protein from cell extracts, which were separated in a 12.5% sodium dodecyl sulfate polyacrylamide gel electrophoresis (SDS-PAGE), and electro-transferred to a nitrocellulose membrane (Bio-Rad). After blocking with 5% skim milk powder/TBS-0.1%Tween, membranes were incubated with the relevant primary antibody at 1:1000 dilution (Supplementary CTAT table and Supplementary Table 3) overnight at 4°C. Then, membranes were probed with an appropriate horseradish peroxidase-conjugated secondary antibody at 1:5000 dilution for 1 hour at room temperature. Using Novex ECL Chemiluminescent Substrate Reagent Kit (Invitrogen) and iBright CL1500 Imaging System (Invitrogen), bands were visualized and quantification was carried out with ImageJ software (National Institutes of Health, USA).[11]  $\beta$ -actin or  $\alpha$ -tubulin protein levels were used to normalize protein loading and expression.

### *Cell viability, proliferation and apoptosis*

Cell viability was assessed by using the colorimetric WST-1 (Roche) assay, as per manufacturer's instructions. Briefly,  $3 \times 10^3$  cells were seeded in each well of a collagen-coated 96-well plate in fully-supplemented Dulbecco's modified Eagle's medium (DMEM)/F-12 medium.[13] The day after, cells were treated with different dosages of SAME for 48 hours.

Cell proliferation was measured by flow-cytometry using CellTrace CFSE Cell Proliferation Kit (Invitrogen), following manufacturer's instructions. In short, cells were harvested, resuspended with PBS 0.1% BSA and labeled with  $10 \mu\text{M}$  CFSE. Then, cold fully-supplemented DMEM/F-12 medium was added and the cells were placed on ice for 5 min. After three washes with fully-supplemented DMEM/F-12 medium,  $3 \times 10^4$  cells were seeded per well in a 12-well plate. The next day, cells received different dosages of SAME for 48 hours. Fluorescence of cells was measured by flow-cytometry in Guava easyCyte 8HT Benchtop Flow Cytometer (Merck Millipore) after harvesting, centrifuging and resuspending the cells in PBS.

Apoptotic rate of cells was evaluated by flow-cytometry Shortly,  $2.5 \times 10^4$  cells per well were seeded in a 24-well plate in fully-supplemented DMEM/F-12 medium. Twenty-four hours later, cells were treated with different dosages of SAME and/or MG132 for 48 hours. Next, cells were harvested and stained with FITC Annexin V (BioLegend) and TO-PRO-3 Iodide (Invitrogen). Fluorescence was measured by flow-cytometry in Guava easyCyte 8HT Benchtop Flow Cytometer (Merck Millipore).

### *Primary cilia*

Polycystic human cholangiocytes (PHC) were seeded at a density of  $5 \times 10^4$  and cultured on collagen-coated glass coverslips in a 24-well plate until they reached confluence. Afterwards, SAME (1.0 mM) was administered and replaced every 48 hours for a total period of 7 days. For the analysis of the number of ciliated cholangiocytes, cells were washed with PBS 1X and fixed with ice-cold methanol for 10 min at  $-20^\circ$ . Samples were washed 3 times with PBS 1X and incubated with 0.5% Triton-100X/PBS 1X for 20 min at room temperature for cell membrane permeabilization. Next, cells were blocked with 1%BSA/5%FBS/0.5% Triton-100X/PBS 1X for 30 min at room temperature and incubated overnight at  $4^\circ\text{C}$  with acetylated  $\alpha$ -tubulin antibody (1:1000; Sigma). Afterwards, cells were incubated for 2 hours at room temperature with Alexa Fluor 488 secondary antibody (Life Technologies). Coverslips were mounted on slides using VECTASHIELD® mounting medium with DAPI (Vector laboratories). Images were obtained at 40X with a confocal laser scanning microscope (LSM 900, ZEISS). Finally, images were analyzed and the number of ciliated cells was calculated.

### *Cell transfection with short hairpin RNA*

PHC were seeded in a 6-well plate at a density of  $2 \times 10^5$  and left for overnight attachment before transfection. Then, DNA plasmids of control short hairpin RNAs (shRNA, Sigma) or shRNA against *ubiquitin conjugating enzyme E2 I (UBE2I)* (TRCN0000329448, Sigma) in Opti-MEM (Gibco) were combined with FuGENE HD (Promega) at a ratio of 1:4 in order to form complexes. After 15 min of incubation, the mixture was added dropwise to the wells. Medium was changed after 24 hours to fully-supplemented DMEM/F-12 medium. In order to obtain stable transfected cell lines, 1.5  $\mu\text{g/ml}$  puromycin (Sigma) was added to the cells

for 7 days. *UBE2I* knockdown was verified by protein expression using immunoblotting.

#### *Immunoprecipitation*

First, 1 mg of whole cell lysate from normal human cholangiocytes (NHC) and PHC was precleared by incubating the samples with Dynabeads Protein G (Invitrogen), concentration according to manufacturer's instructions. In parallel, another amount of Dynabeads Protein G was incubated with SUMO1 antibody (Abcam) or, as negative control, with immunoglobulin G (IgG) antibody (Abcam) and crosslinked with freshly prepared bis(sulfosuccinimidyl)suberate (BS<sup>3</sup>, Thermo Scientific). Then, the precleared cell lysates were incubated with the SUMO1- or IgG- crosslinked Dynabeads. Finally, the proteins were eluted from the Dynabeads with 2% SDS.

#### *Mass spectrometry and proteomic analysis*

Samples of control shRNA and shRNA against *UBE2I*, as well as SUMO1-immunoprecipitation (IP) lysates, were extracted or eluted using 7 M urea, 2 M thiourea, 4% CHAPS. Samples were incubated for 30 min at room temperature under agitation and digested following the Filter-Aided Sample Preparation protocol [14] with minor modifications. Trypsin was added to a trypsin:protein ratio of 1:10, and the mixture was incubated overnight at 37°C, dried out in a RVC2 25 speedvac concentrator (Christ), and resuspended in 0.1% formic acid (FA).

Samples were analyzed in a novel hybrid trapped ion mobility spectrometry – quadrupole time of flight mass spectrometer parallel accumulation serial fragmentation (tims TOF Pro with PASEF, Bruker Daltonics) coupled online to a nanoElute liquid chromatograph (Bruker). This mass spectrometer takes advantage of a novel scan mode termed parallel accumulation – serial

fragmentation (PASEF), which multiplies the sequencing speed without any loss in sensitivity [15] and has been proven to provide outstanding analytical speed and sensibility for proteomics analyses.[16] Sample (200 ng) was directly loaded in a 15 cm nanoElute FIFTEEN C18 analytical column (Bruker) and resolved at 400 nl/min with a 30 min gradient. Column was heated to 50°C using an oven.

Protein identification and quantification for control shRNA and shRNA against *UBE2I* samples were carried out using PEAKS software (Bioinformatics Solutions Inc). Searches were carried out against a database consisting of human entries (Uniprot/Swissprot), with precursor and fragment tolerances of 20 ppm and 0.05 Da. Only proteins identified with at least two peptides at false discovery rate (FDR) <1% were considered for further analysis. Data was loaded onto Perseus platform [17] and further processed (log<sub>2</sub> transformation, imputation).

Protein identification and quantification for SUMO-1 IP lysates were carried out using Mascot search engine (Matrix Science Ltd.) through Proteome Discoverer software 1.4 (Thermo). 50ppm and 0.05Da were used for precursor and fragment searches, and a database consisting of human entries (Uniprot/Swissprot) was used for the searches. Only proteins identified with at least two peptides at FDR<1% in at least two sample replicas and not present in the negative control were considered for further analysis.

Spectral counts for each protein (the number of identified spectra matching to peptides from that protein, also named SpC or PSMs) were used for the differential analysis. Data was loaded onto Perseus platform and further processed (log<sub>2</sub> transformation, imputation). A *t*-test was applied in order to determine the statistical significance of the differences detected. Functional



analyses of proteins were performed in the STRING database,[18] and by gene ontology (GO) enrichment using DAVID Bioinformatics Resources. Details are outlined in the Supplementary data.[19] In addition, heatmaps were generated using Heatmapper for data visualization.[20] The mass spectrometry proteomics data have been deposited to the ProteomeXchange Consortium via the PRIDE [21] partner repository with the dataset identifiers PXD021139 and PXD021140.

## Supplementary Figures

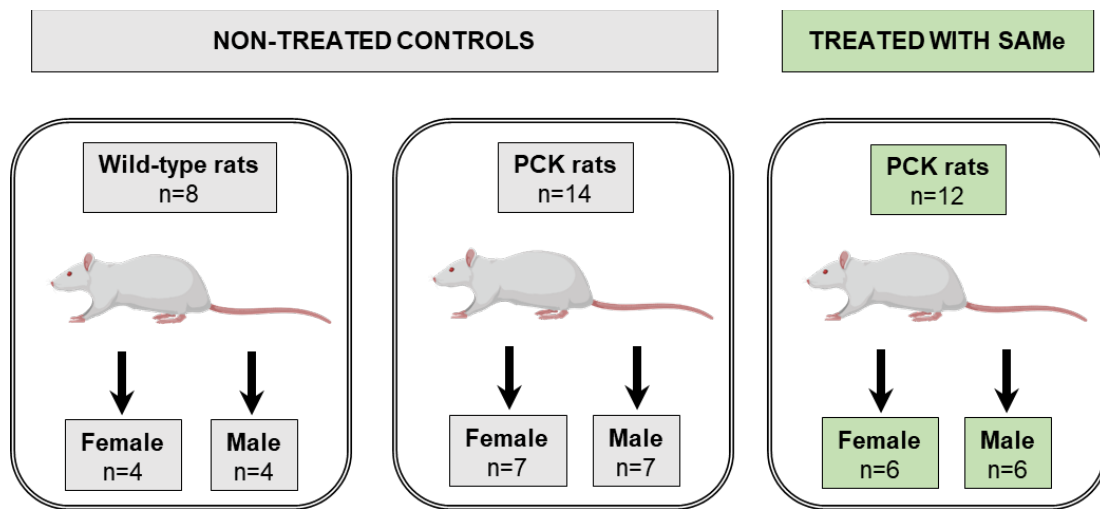

**Supplementary Fig. 1.** Each group of this study consisted 50% female and 50% male rats.

### SUMOylation genes

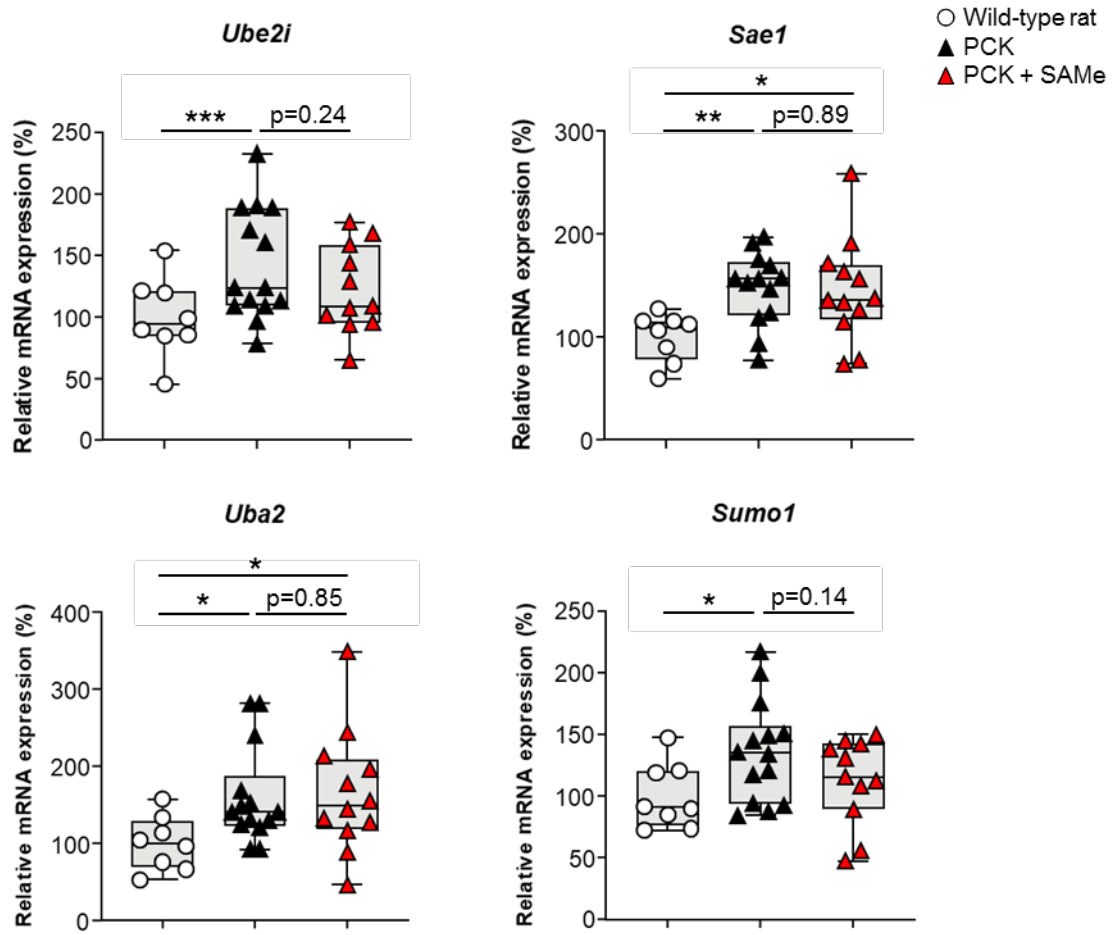

### Pro-inflammatory genes

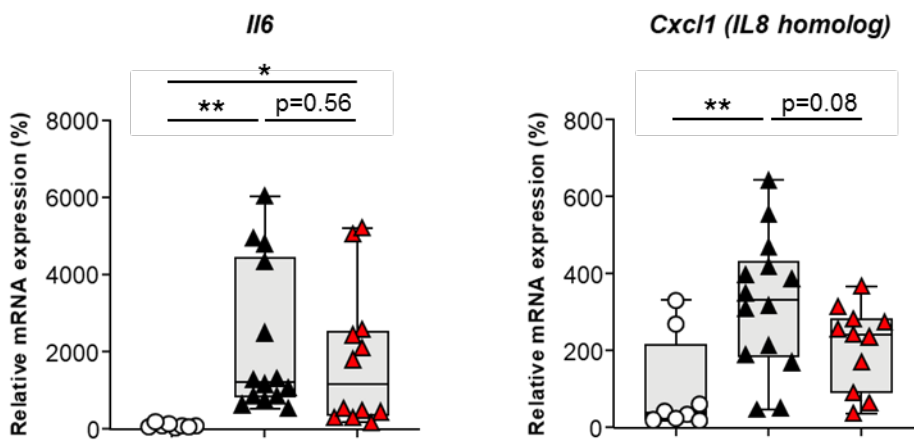

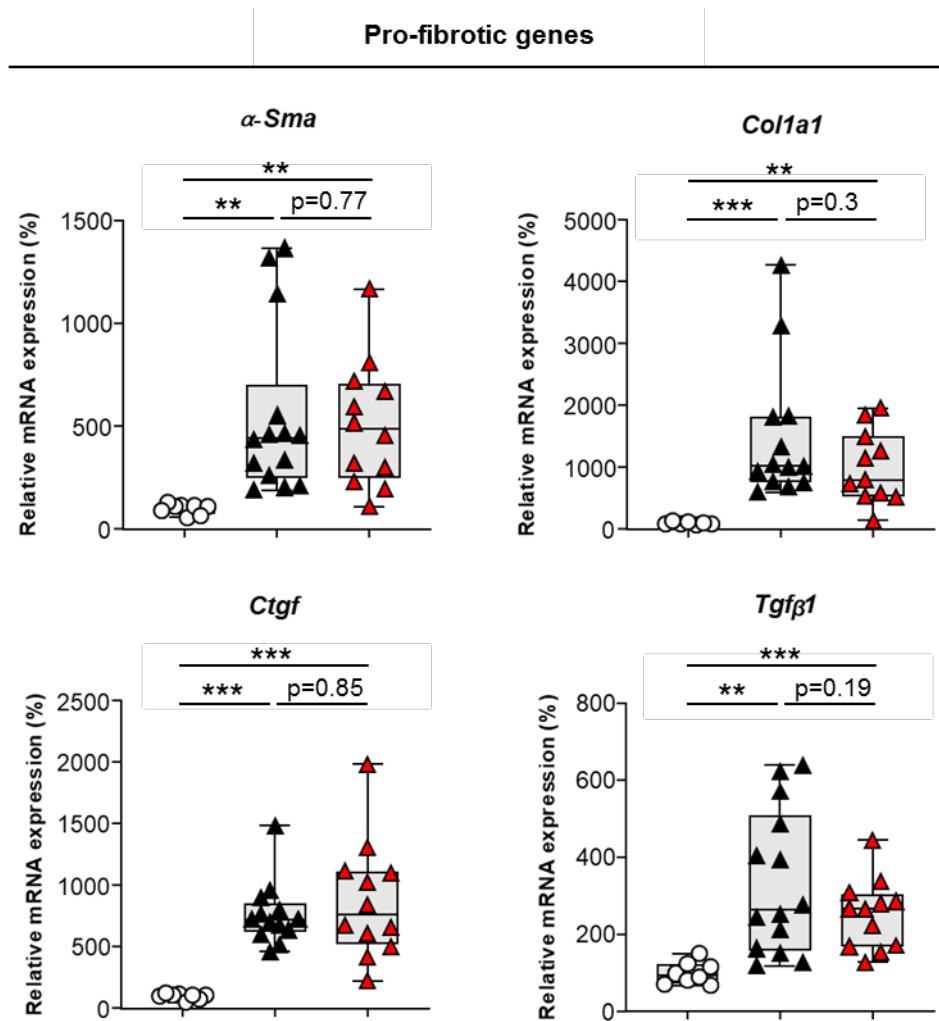

**Supplementary Fig. 2.** mRNA levels of SUMOylation, pro-inflammatory and profibrotic genes in whole liver tissue samples from wild-type, non-treated PCK and SAME-treated PCK rats. Five months of SAME treatment (20 mg/kg/day). Data shown as mean  $\pm$  SEM. \* $p < 0.05$ ; \*\* $p < 0.01$ ; \*\*\* $p < 0.001$  (one-way ANOVA, Kruskal-Wallis tests)

*Abbreviations:*  $\alpha$ -Sma, alpha smooth muscle actin; Col1a1, collagen type 1 alpha 1 chain; Ctgf, connective tissue growth factor; Cxcl1, chemokine (C-X-C motif) ligand 1; Il6, interleukin 6; Sae1, SUMO1 activating enzyme subunit 1; Sumo1, small ubiquitin like modifier 1; Tgf $\beta$ 1, transforming growth factor beta 1; Uba2, SUMO1 activating enzyme subunit 2; Ube2i, ubiquitin conjugating enzyme E2 I.

**A**

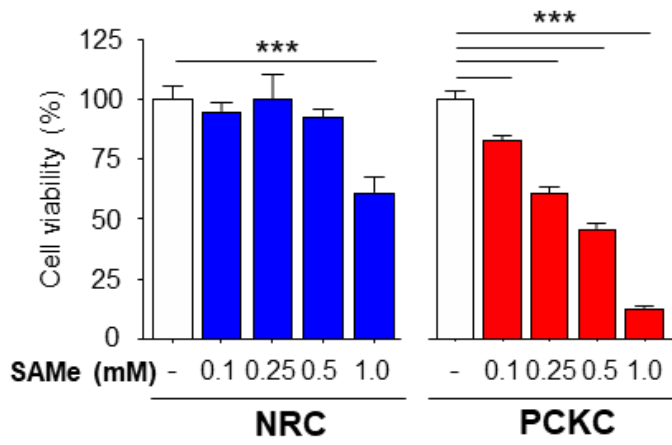

**B**

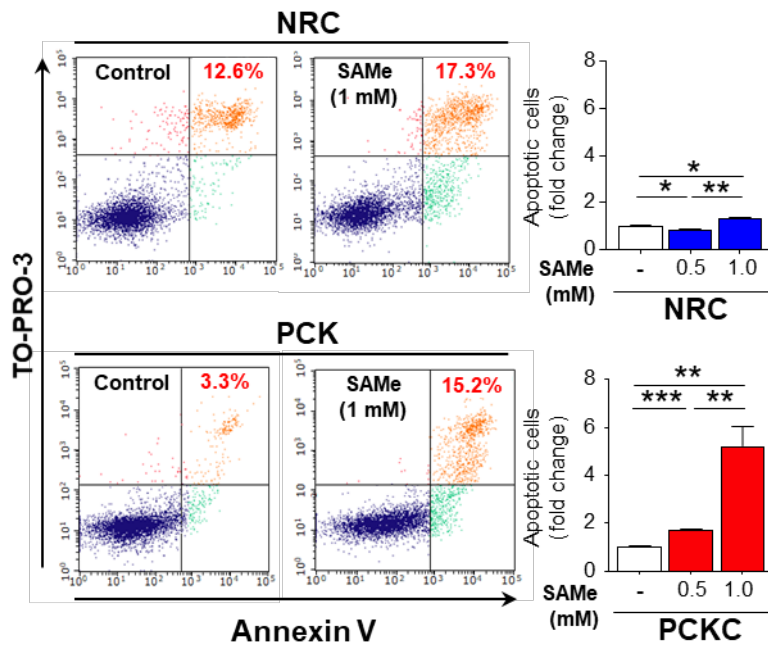

C

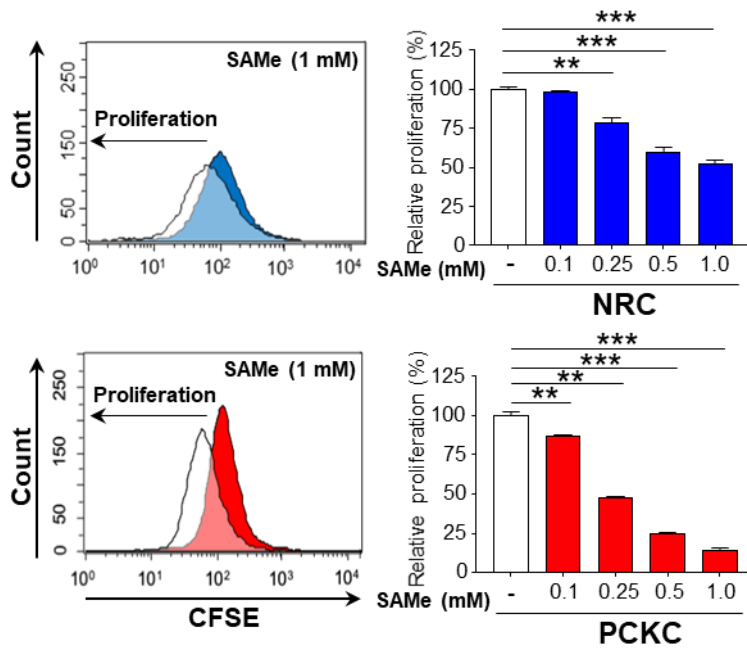

**Supplementary Figure 3.** Cell (A) viability (n=6), (B) apoptosis (n=4), and (C) proliferation (n=3) in untreated or SAME-treated NRC and PCKC. Data shown as mean + SEM. \*p<0.05; \*\*p<0.01; \*\*\*p<0.001 (one-way ANOVA, Kruskal-Wallis, Mann-Whitney or 2-tailed t-tests).

**A** Whole cell lysates

Proteins identified: 3,758

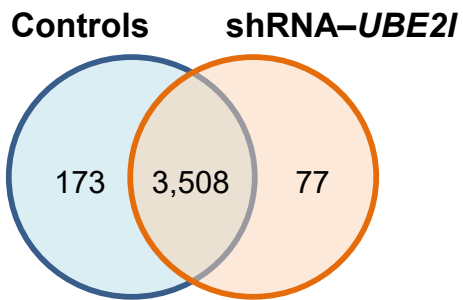

**B**

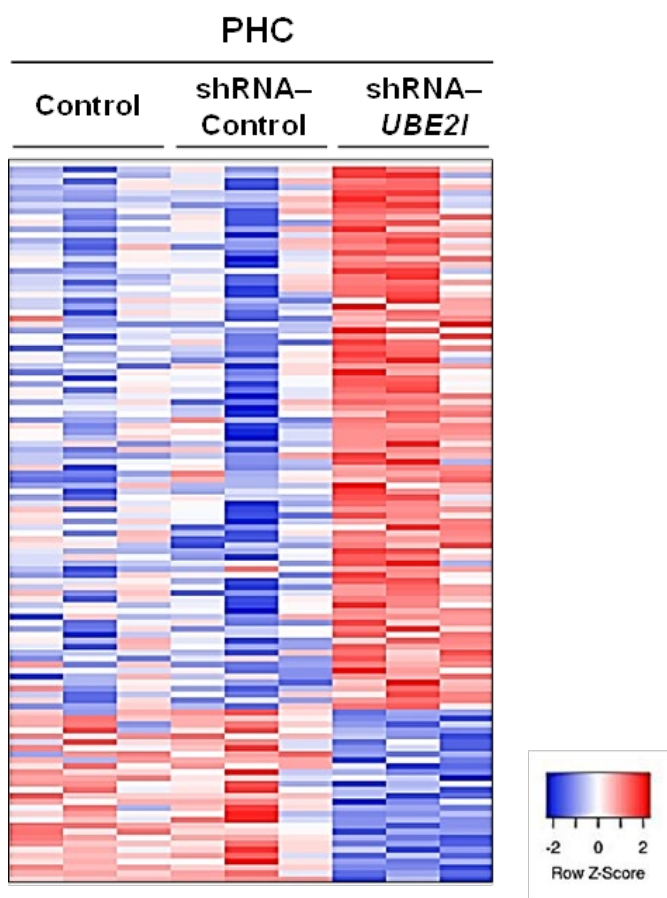

C

Protein-protein interactions associated to *UBE2I* silencing

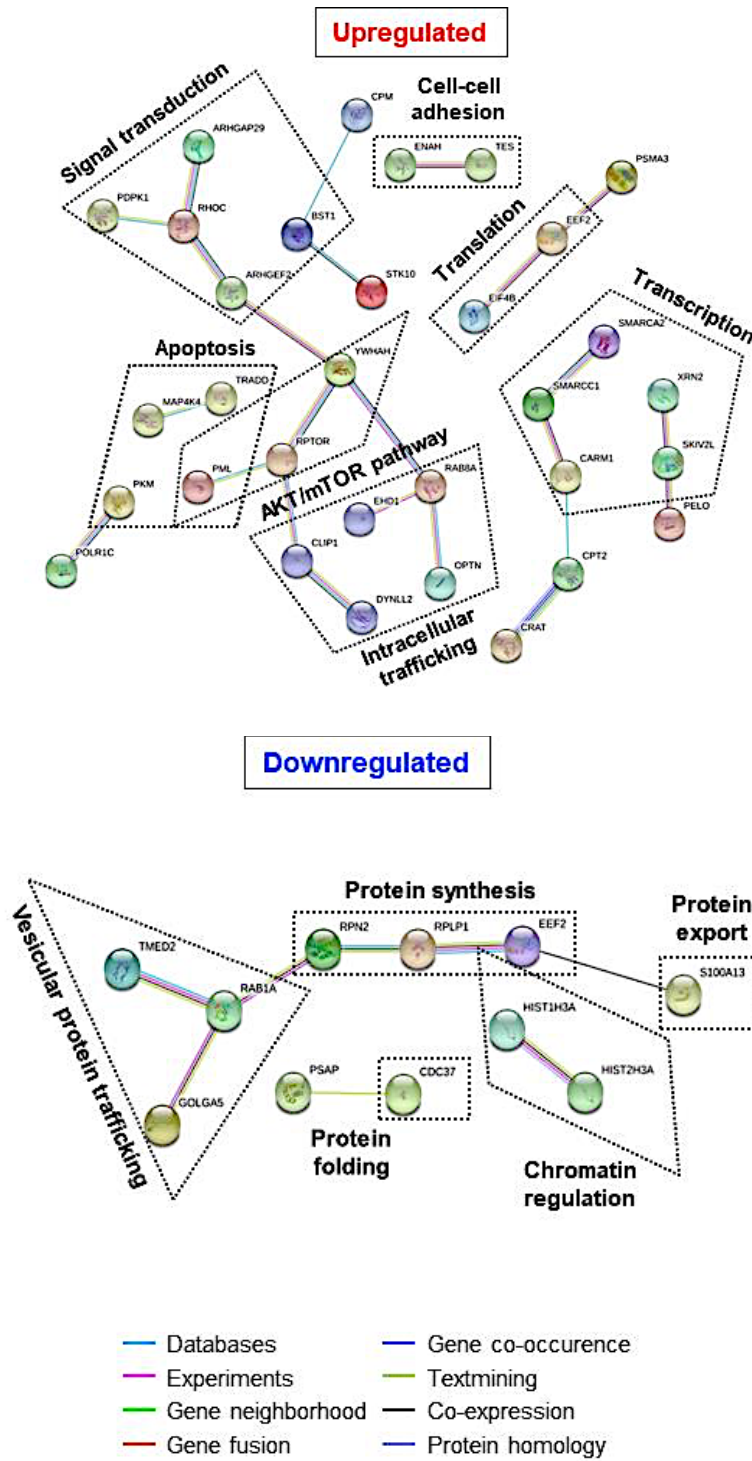

**Supplementary Figure 4.** (A) Venn diagram of all identified proteins (3,758). (B) Proteomic analyses of the significant dysregulated proteins (n=120) by heatmap representation, and (C) PPI network associated to *UBE2I* silencing.



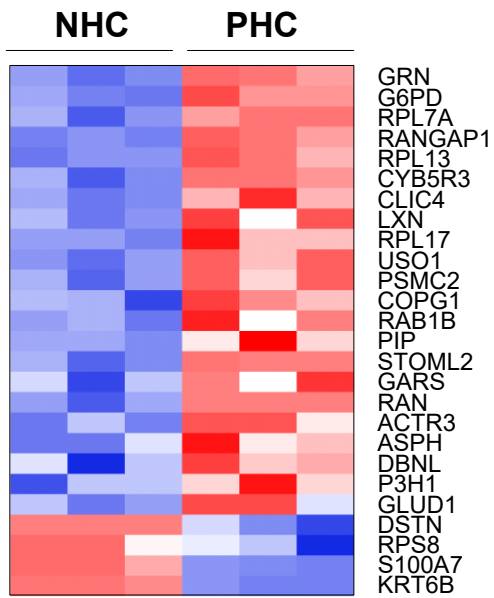

**Supplementary Fig. 5.** Heatmap including the significantly enriched SUMO1-IP proteins in PHC compared to NHC.

**A**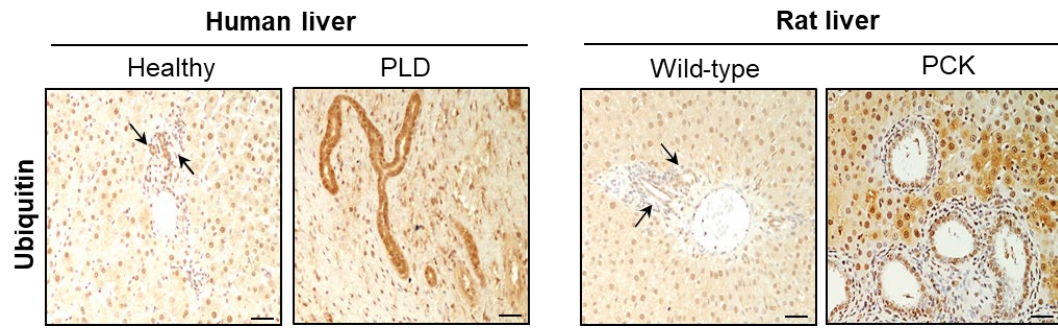**B**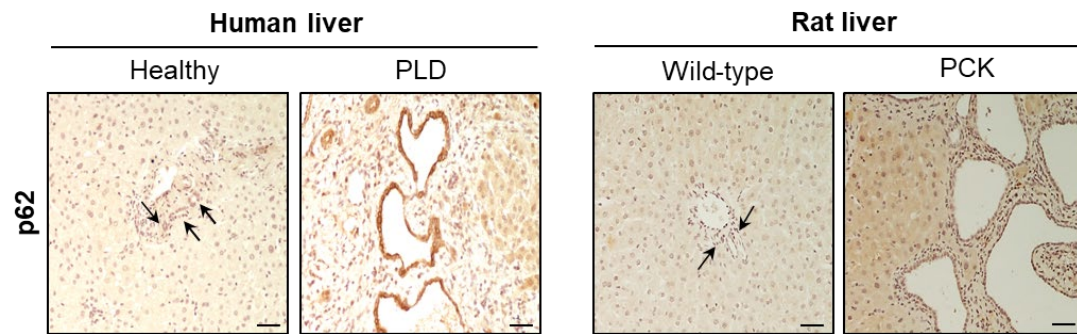**C**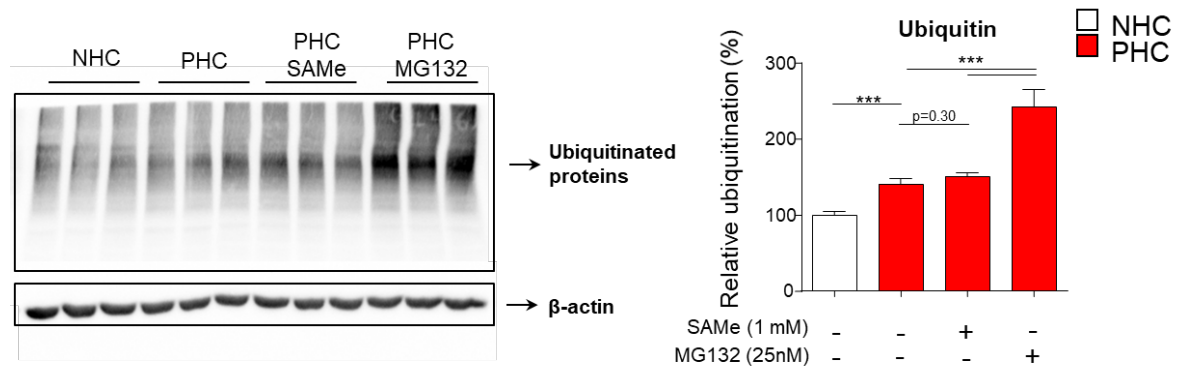**D**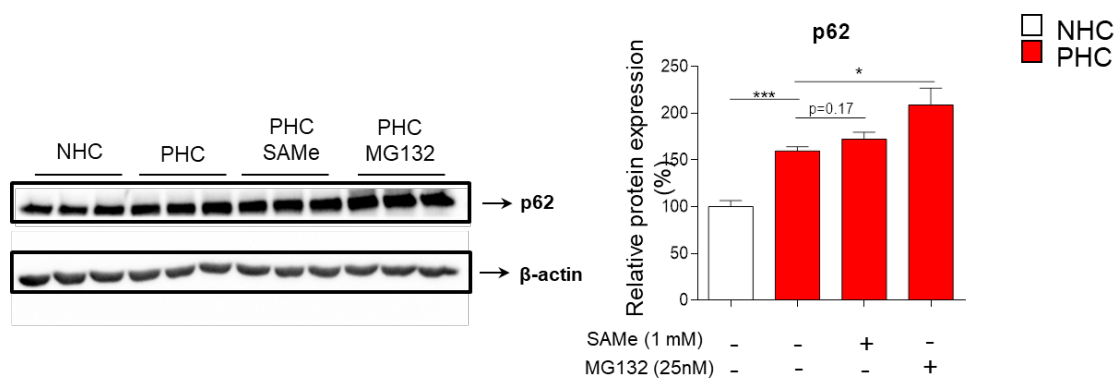

**E**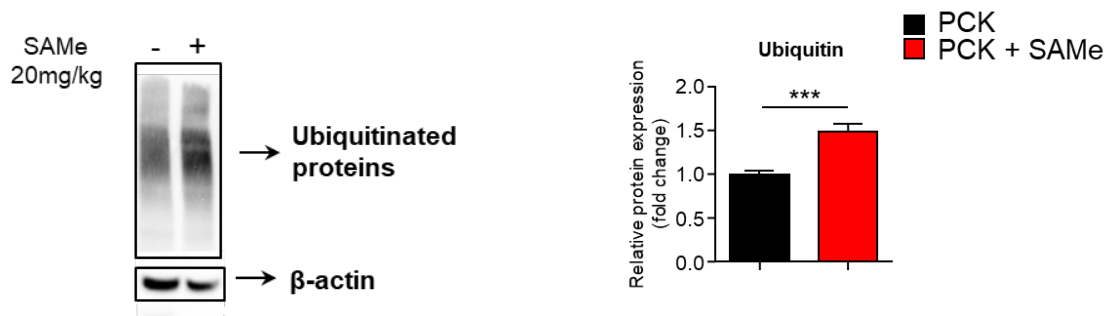**F**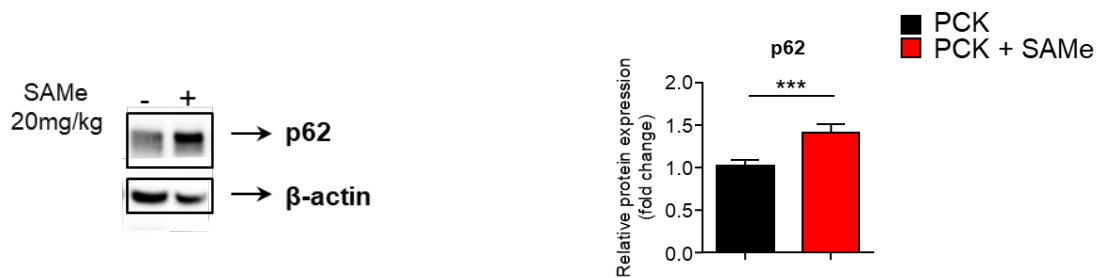

**Supplementary Fig. 6.** A) Representative IHC images of ubiquitin and B) p62 in human and rat liver tissue. C) Representative immunoblot and quantification of ubiquitin-conjugated proteins and D) p62 expression in NHC and PHC under baseline conditions, as well as in PHC under SAME or MG132 incubation (n=3). E) Representative immunoblot and quantification of ubiquitin-conjugated proteins and F) p62 expression in non-treated (n=14) or SAME-treated (n=12) PCK livers. Data shown as mean + SEM. \*p<0.05; \*\*\*p<0.001 (one-way ANOVA, Kruskal-Wallis, 2-tailed t-tests).

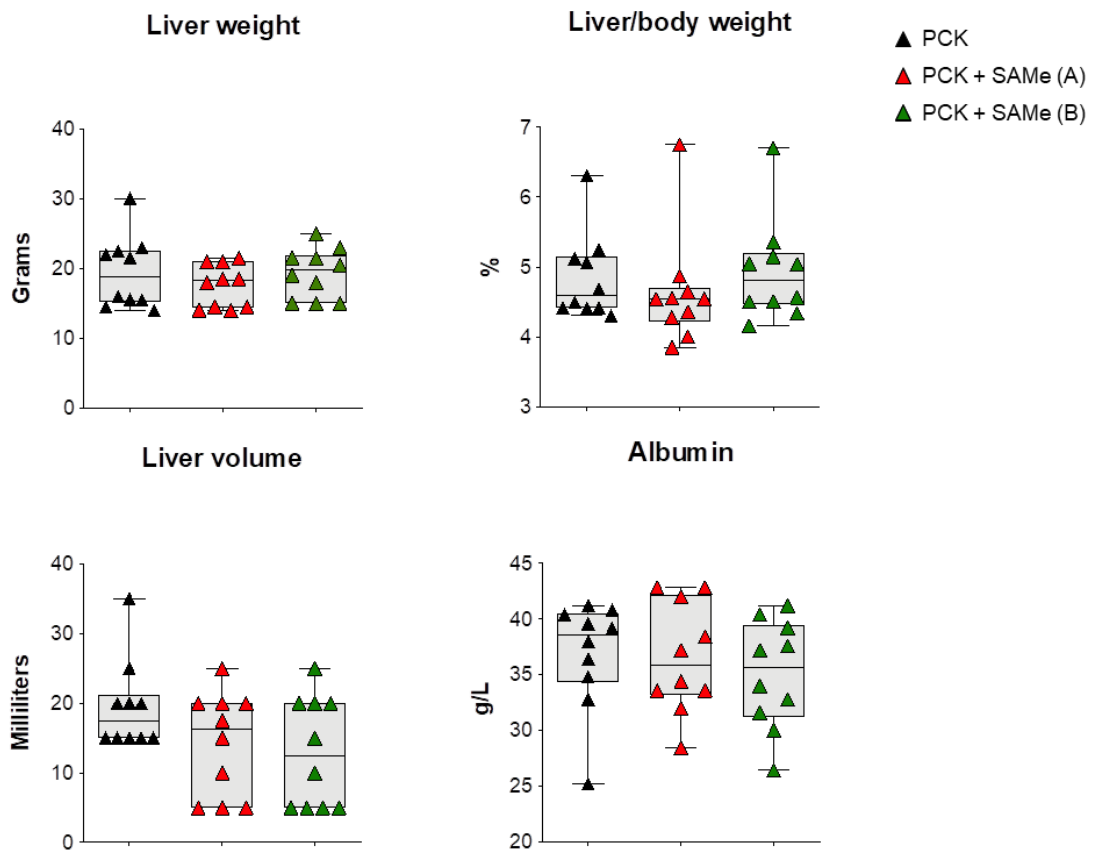

**Supplementary Fig. 7.** Liver weight, liver/body weight ratio, liver volume and albumin in non-treated PCK and SAME-treated PCK rats at sacrifice. Two months of SAME treatment with either (A) 50 mg/kg/day or (B) 100 mg/kg/day. Data shown as mean  $\pm$  SEM. (one-way ANOVA, Kruskal-Wallis tests)

## Supplementary Tables

**Supplementary Table 1.** Demographic and clinical features of the study cohort.

| Variable                              | PLD (n=16)          | Gallbladder (n=14)  | Healthy liver (n=14) |
|---------------------------------------|---------------------|---------------------|----------------------|
| <b>Age</b> , mean $\pm$ SEM           | 51.25 $\pm$ 3.07    | 63.36 $\pm$ 3.63    | 66.36 $\pm$ 2.02     |
| <b>Age</b> , range                    | 35 – 71             | 31 – 79             | 55 - 80              |
| <b>Gender</b>                         |                     |                     |                      |
| Female (%)                            | 14 (87.50)          | 5 (35.71)           | 7 (50.00)            |
| Male (%)                              | 2 (12.50)           | 9 (64.29)           | 7 (50.00)            |
| <b>Germline mutation</b>              |                     |                     |                      |
| <i>PRKCSH</i> (%)                     |                     |                     |                      |
| c.1341-2A>G                           | 4 (25.00)           | -                   | -                    |
| c.292+1G>C                            | 1 (6.25)            | -                   | -                    |
| <i>SEC63</i> (%)                      |                     |                     |                      |
| 1702delGAA                            | 1 (6.25)            | -                   | -                    |
| Other (%)                             | 8 (50.00)           | -                   | -                    |
| Unknown (%)                           | 2 (12.50)           | -                   | -                    |
| <b>Number of liver cysts (%)</b>      |                     |                     |                      |
| None                                  | 0 (0.0)             | 14 (100.0)          | 14 (100.0)           |
| <10                                   | 2 (12.50)           | -                   | -                    |
| 10-40                                 | 5 (31.25)           | -                   | -                    |
| >40                                   | 8 (50.00)           | -                   | -                    |
| Unknown                               | 1 (6.25)            | -                   | -                    |
| <b>Number of renal cysts (%)</b>      |                     |                     |                      |
| None                                  | 8 (50.0)            | 14 (100.0)          | 14 (100.0)           |
| <10                                   | 6 (37.50)           | -                   | -                    |
| 10-40                                 | 1 (6.25)            | -                   | -                    |
| >40                                   | 1 (6.25)            | -                   | -                    |
| <b>Biochemistry</b> , median (95% CI) |                     |                     |                      |
| ALT (U/L)                             | 27.0 (21.0 – 41.0)  | 22.0 (12.0 – 102.0) | 23.5 (16.0 – 28.0)   |
| AST (U/L)                             | 29.0 (17.0 – 35.0)  | 23.0 (17.0 – 106.0) | 21.5 (17.0 – 30.0)   |
| Albumin (g/L)                         | 38.0 (33.0 – 44.0)  | 41.8 (40.2 – 50.1)  | 41.2 (27.6 – 45.7)   |
| Alkaline phosphatase (U/L)            | 69.0 (61.0 – 119.0) | 84.0 (69.0 – 160.0) | 69.0 (50.0 – 135.0)  |
| Creatinine (mg/dL)                    | 0.86 (0.72 – 1.18)  | 0.80 (0.66 – 1.01)  | 0.80 (0.70 – 1.02)   |
| Blood urea (mg/dL)                    | 29.0 (20.0 – 42.0)  | 31.5 (25.0 – 52.0)  | 32.0 (26.0 – 44.0)   |

*Abbreviations:* PRKCSH, protein kinase C substrate 80K-H; SEC63, translocation protein SEC63 homolog.

**Supplementary Table. 2.** Human and rat primers used in qPCR.

| <b>Primers</b>                                                         | <b>Species</b> | <b>Sequence 5' – 3'</b>                                |
|------------------------------------------------------------------------|----------------|--------------------------------------------------------|
| <i>ATF6</i> FW<br><i>ATF6</i> RV                                       | Human          | GCTGGATGAAGTTGTGTCAGAG<br>TGTTCCAACATGCTCATAGGTC       |
| <i>ATG5</i> FW<br><i>ATG5</i> RV                                       | Human          | CGTCCTGTGGCTGCAGATG<br>AAGGACAAACTTCTTTGAGGAGA         |
| <i>BAX</i> FW<br><i>BAX</i> RV                                         | Human          | CCCGAGAGGTCTTTTTCCGA<br>CCAGCCCATGATGGTTCTGAT          |
| <i>BECN1</i> FW<br><i>BECN1</i> RV                                     | Human          | GATGGAAGGGTCTAAGACGTCCAA<br>TTTCGCCTGGGCTGTGGTAAG      |
| <i>BIM</i> FW<br><i>BIM</i> RV                                         | Human          | GCCCCTACCTCCCTACAGAC<br>CCTCATGGAAGCCATTGCAC           |
| <i>CHOP</i> FW<br><i>CHOP</i> RV                                       | Human          | TCTTCATACATCACCACACC<br>CTTGTGACCTCTGCTGGTTC           |
| <i>DR5</i> FW<br><i>DR5</i> RV                                         | Human          | ACAGTTGCAGCCGTAGTCTTG<br>CCAGGTCGTTGTGAGCTTCT          |
| <i>GAPDH</i> FW<br><i>GAPDH</i> RV                                     | Human          | CCAAGGTCATCCATGACAAC<br>TGTCATAACCAGGAAATGAGC          |
| <i>GRP78</i> FW<br><i>GRP78</i> RV                                     | Human          | GAGCTGTGCAGAACTCCGGCG<br>ACCAGTTGCTGAATCTTTGGAATTCGAGT |
| <i>IRE1<math>\alpha</math></i> FW<br><i>IRE1<math>\alpha</math></i> RV | Human          | AGGGAGAGGAGGGAATCGTA<br>CAGTCCCTAATGCCACACCT           |
| <i>LC3B</i> FW<br><i>LC3B</i> RV                                       | Human          | GGTGAGAAGCAGCTTCCTGT<br>TCTCCTGGGAGGCATAGACC           |
| <i>MAT1A</i> FW<br><i>MAT1A</i> RV                                     | Human          | GTTCACATCGGAGTCTGTGG<br>GATGTGCTTGATGGTGTCC            |
| <i>MAT2A</i> FW<br><i>MAT2A</i> RV                                     | Human          | GCTACGAGTAGAACGCTGTC<br>GCATCAGGATCCTGCTGAAG           |
| <i>MAT2B</i> FW<br><i>MAT2B</i> RV                                     | Human          | CAGATGCTGCCTCTCAAC<br>GAACCTCTGCTGCCAGTG               |
| <i>SQSTM1/P62</i> FW<br><i>SQSTM1/P62</i> RV                           | Human          | TACGACTTGTGTAGCGTCTG<br>CGTGTTTCACCTTCCGGAG            |
| <i>PERK</i> FW<br><i>PERK</i> RV                                       | Human          | CAGGCAAAGGAAGGAGTCTG<br>AACAACTCCAAAGCCACCAC           |
| <i>SAE1</i> FW                                                         | Human          | CTTGCTGCTCCAGGGATGTC                                   |

|                                                                |       |                                                |
|----------------------------------------------------------------|-------|------------------------------------------------|
| <i>SAE1</i> RV                                                 |       | GACCATCGTTGTCTCAGAAG                           |
| <i>SOX9</i> FW<br><i>SOX9</i> RV                               | Human | GTACCCGCACTTGCACAAC<br>TCGCTCTCGTTCAGAAGTCTC   |
| <i>SOX17</i> FW<br><i>SOX17</i> RV                             | Human | GTGGACCGCACGGAATTTG<br>GGAGATTCACACCGGAGTCA    |
| <i>SUMO1</i> FW<br><i>SUMO1</i> RV                             | Human | CCGTCATCATGTCTGACC<br>GGAACACCCTGTCTTTGAC      |
| <i>UBA2</i> FW<br><i>UBA2</i> RV                               | Human | CGTTGCCTACCATGACAGC<br>GAGGAACATCAGCTGCCAG     |
| <i>UBIQUITIN</i> FW<br><i>UBIQUITIN</i> RV                     | Human | CCTGAGGGGTGGCTGTTA<br>GCTACCATGCAACGAAACC      |
| <i>UBE2I</i> FW<br><i>UBE2I</i> RV                             | Human | GGACTTTGAACATGTCCG<br>CCGAAGGGTACACATTCGG      |
| <i>s-XBP1</i> FW<br><i>s-XBP1</i> RV                           | Human | GCTGAGTCCGCAGCAGGT<br>CTGGGTCCAAGTTGTCCAGAAT   |
| <i>ZO-1</i> FW<br><i>ZO-1</i> RV                               | Human | CGGTCCTCTGAGCCTGTAAG<br>GGATCTACATGCGACGACAA   |
| <i>α-Sma</i> FW<br><i>α-Sma</i> RV                             | Rat   | CGCCATCAGGAACCTCGAGAAG<br>ATCATCACCAGCAAAGCCCG |
| <i>Col1a1</i> FW<br><i>Col1a1</i> RV                           | Rat   | GACTGTCCCAACCCCAAA<br>CTTGGGTCCCTCGACTCCTA     |
| <i>Ctgf</i> FW<br><i>Ctgf</i> RV                               | Rat   | CTAGCTGCCTACCGACTGGA<br>GCCCATCCCACAGGTCTTAG   |
| <i>Cxcl1 (IL8 homolog)</i> FW<br><i>Cxcl1 (IL8 homolog)</i> RV | Rat   | ACTCAAGAATGGTCCGCGAGG<br>ACGCCATCGGTGCAATCTAT  |
| <i>Gapdh</i> FW<br><i>Gapdh</i> RV                             | Rat   | TGTGAACGGATTTGGCCGTA<br>ATGAAGGGGTCGTTGATGGC   |
| <i>Il6</i> FW<br><i>Il6</i> RV                                 | Rat   | CATTCTGTCTCGAGCCCACC<br>AGTCCCAAGAAGGCAACTGG   |
| <i>Mat1a</i> FW<br><i>Mat1a</i> RV                             | Rat   | CGAGAAGTGTGACACCATG<br>CATCCAGCACTGCATCAC      |
| <i>Mat2a</i> FW<br><i>Mat2a</i> RV                             | Rat   | CACTTCAGAGTCTGTAGG<br>CCTGCACCAATGTCTTCCTC     |
| <i>Mat2b</i> FW<br><i>Mat2b</i> RV                             | Rat   | GAGAAGGAGCTCTCCATCC<br>CAGCAGGTTACCTGTTCCG     |

|                                    |     |                                              |
|------------------------------------|-----|----------------------------------------------|
| <i>Sae1</i> FW<br><i>Sae1</i> RV   | Rat | GTCGACCAGATCTGTCACAG<br>CACTCCAGTCCACTGCTAG  |
| <i>Sumo1</i> FW<br><i>Sumo1</i> RV | Rat | GACAGCAGTGAGATCCAT<br>CTAAGAGATGGAGTGCCAG    |
| <i>Tgfβ1</i> FW<br><i>Tgfβ1</i> RV | Rat | CTGCTGACCCCCACTGATAC<br>AGCCCTGTATTCCGTCTCCT |
| <i>Uba2</i> FW<br><i>Uba2</i> RV   | Rat | CCATGACAGCATCATGAACC<br>CTCTGTCAGGAGACACTTC  |
| <i>Ube2i</i> FW<br><i>Ube2i</i> RV | Rat | CGTGTATCCTTCTGGCAC<br>CTTCGCTTGTGCTCGAAC     |

*Abbreviations:*  $\alpha$ -Sma, alpha smooth muscle actin; ATF6, activating transcription factor 6; ATG5, autophagy related 5; BAX, Bcl-2 associated X apoptosis regulator; BECN1, Beclin-1; BIM, Bcl-2-like protein 11; CHOP, DNA damage-inducible transcript 3; Col1a1, collagen type 1 alpha 1 chain; Ctgf, connective tissue growth factor; Cxcl1, chemokine (C-X-C motif) ligand 1; DR5, death receptor 5; FW, forward; GAPDH, glyceraldehyde 3-phosphate dehydrogenase; GRP78, heat shock 70kD protein 5; Il6, interleukin 6; IRE1 $\alpha$ , serine/threonine-protein kinase/endoribonuclease inositol-requiring enzyme 1 $\alpha$ ; LC3B, microtubule-associated protein 1 light chain 3 beta; MAT1A, methionine adenosyltransferase 1A; MAT2A; methionine adenosyltransferase 2A; MAT2B; methionine adenosyltransferase 2B; PERK, PKR-like ER kinase; RV, reverse; SAE1, SUMO1 activating enzyme subunit 1; SOX9, SRY-box 9; SOX17, SRY-box 17; SQSTM1, Sequestosome 1; SUMO1, small ubiquitin like modifier 1; s-XBP1, spliced X-box binding protein 1; Tgf $\beta$ 1, transforming growth factor beta 1; UBA2, SUMO1 activating enzyme subunit 2; UBE2I, ubiquitin conjugating enzyme E2 I; ZO-1, zonula occludens-1.



**Supplementary Table 3.** Antibodies used in this study for different applications.

| <b>Antibody</b>                                    | <b>Company</b> | <b>Reference</b> | <b>Application</b> |
|----------------------------------------------------|----------------|------------------|--------------------|
| Rabbit monoclonal anti-SUMO1                       | Abcam          | ab32058          | IHC, WB            |
| Rabbit monoclonal anti-SUMO1 (BSA and Azide free)  | Abcam          | ab219724         | IP, WB             |
| Rabbit monoclonal anti-UBC9                        | Abcam          | ab75854          | IHC, WB            |
| Rabbit monoclonal anti-Ubiquitin                   | Abcam          | ab134953         | IHC, WB            |
| Mouse monoclonal anti-p62                          | Abcam          | ab56416          | IHC, WB            |
| Mouse monoclonal anti-Acetylated $\alpha$ -tubulin | Sigma-Aldrich  | T6793            | IF, WB             |
| Rabbit monoclonal anti- $\alpha$ -tubulin          | Abcam          | ab52866          | IF, WB             |
| Mouse monoclonal anti $\beta$ -actin               | Sigma          | A5316            | WB                 |
| Rabbit monoclonal IgG                              | Abcam          | ab172730         | IP                 |
| Anti-mouse IgG, HRP-linked Antibody                | Cell Signaling | #7076            | WB                 |
| Anti-rabbit IgG, HRP-linked Antibody               | Cell Signaling | #7074            | WB                 |
| Anti-mouse IgG, Alexa Fluor 488                    | Invitrogen     | A28175           | IF                 |

*Abbreviations:* HRP, horseradish peroxidase; IgG, immunoglobulin G; IP, immunoprecipitation; IHC, immunohistochemistry; SUMO1, small ubiquitin-related modifier 1; UBC9, SUMO-conjugating enzyme UBC9; WB, Western Blot.

**Supplementary Table. 4.** Physical and serum biochemical parameters of the animals at sacrifice.

|                                         | <b>A</b>              | <b>B</b>                      | <b>C</b>                       |                         |                         |                         |
|-----------------------------------------|-----------------------|-------------------------------|--------------------------------|-------------------------|-------------------------|-------------------------|
| <b>Parameters (units)</b>               | <b>Wild-type Rats</b> | <b>PCK Rats (non-treated)</b> | <b>PCK Rats (SAmE-treated)</b> | <b>p value (A vs B)</b> | <b>p value (B vs C)</b> | <b>p value (C vs A)</b> |
| <b>Body weight (g)</b>                  | 542.3 ± 64.09         | 486.2 ± 33.99                 | 459.5 ± 31.67                  | 0.403                   | 0.576                   | 0.217                   |
| <b>Kidney weight (g)</b>                | 2.61 ± 0.27           | 4.06 ± 0.56                   | 3.28 ± 0.42                    | 0.078                   | 0.293                   | 0.254                   |
| <b>Kidney/body weight (%)</b>           | 0.49 ± 0.02           | 0.88 ± 0.16                   | 0.73 ± 0.11                    | <0.0001*                | 0.252                   | 0.0002*                 |
| <b>Bile flow (µl/min/g)</b>             | 0.026 ± 0.003         | 0.047 ± 0.010                 | 0.025 ± 0.006                  | 0.111                   | 0.110                   | 0.481                   |
| <b>Alkaline phosphatase (U/L)</b>       | 71.5 ± 7.50           | 187.4 ± 16.85                 | 158.7 ± 13.31                  | <0.0001*                | 0.199                   | <0.0001*                |
| <b>Aspartate aminotransferase (U/L)</b> | 233.0 ± 54.48         | 243.1 ± 22.33                 | 234.7 ± 23.06                  | 0.842                   | 0.795                   | 0.975                   |
| <b>Alanine aminotransferase (U/L)</b>   | 46.50 ± 4.95          | 44.29 ± 4.53                  | 47.67 ± 2.80                   | 0.769                   | 0.097                   | 0.828                   |
| <b>Total protein (g/dL)</b>             | 6.51 ± 0.41           | 6.36 ± 0.23                   | 6.37 ± 0.13                    | 0.736                   | 0.970                   | 0.716                   |
| <b>Blood urea (mg/dL)</b>               | 39.50 ± 2.20          | 36.92 ± 2.72                  | 35.00 ± 2.75                   | 0.516                   | 0.462                   | 0.016*                  |

\* = significant

Values as Mean + SEM. \*p<0.05. (t-tests) *Abbreviations:* SAmE, S-adenosylmethionine

**Supplementary Table 5.** Differential proteomic profile of shRNA-*UBE2I* PHC compared to control and shRNA-control PHC.

| UniProt Accession number | Protein                                                                        | p value | Abundance |
|--------------------------|--------------------------------------------------------------------------------|---------|-----------|
| Q6L8Q7                   | 2' 5'-phosphodiesterase 12 (PDE12)                                             | 0.01    | Increased |
| O15530                   | 3-phosphoinositide-dependent protein kinase 1 (PDPK1)                          | 0.02    | Increased |
| Q9H0D6                   | 5'-3' exoribonuclease 2 (XRN2)                                                 | 0.05    | Increased |
| Q04917                   | 14-3-3 protein eta (YWHAH)                                                     | 0.02    | Increased |
| P05386                   | 60S acidic ribosomal protein P1 (RPLP1)                                        | 0.03    | Decreased |
| P83881                   | 60S ribosomal protein L36a (RPL36A)                                            | 0.01    | Increased |
| P68133                   | Actin. alpha skeletal muscle (ACTA1)                                           | 0.03    | Increased |
| Q10588                   | ADP-ribosyl cyclase/cyclic ADP-ribose hydrolase 2 (BST1)                       | 0.02    | Increased |
| Q04828                   | Aldo-keto reductase family 1 member C1 (AKR1C1)                                | 0.001   | Decreased |
| Q9UKV3                   | Apoptotic chromatin condensation inducer in the nucleus (ACIN1)                | 0.04    | Increased |
| Q15121                   | Astrocytic phosphoprotein PEA-15 (PEA15)                                       | 0.0003  | Increased |
| Q9UHQ4                   | B-cell receptor-associated protein 29 (BCAP29)                                 | 0.04    | Increased |
| P54687                   | Branched-chain-amino-acid aminotransferase, cytosolic (BCAT1)                  | 0.03    | Increased |
| P19022                   | Cadherin-2 (CDH2)                                                              | 0.03    | Increased |
| Q05682                   | Caldesmon (CALD1)                                                              | 0.01    | Increased |
| P07384                   | Calpain-1 catalytic subunit (CAPN1)                                            | 0.01    | Increased |
| P13861                   | cAMP-dependent protein kinase type II-alpha regulatory subunit (PRKAR2A)       | 0.02    | Decreased |
| P23786                   | Carnitine O-palmitoyltransferase 2, mitochondrial (CPT2)                       | 0.00    | Increased |
| P30622                   | CAP-Gly domain-containing linker protein 1 (CLIP1)                             | 0.001   | Increased |
| P43155                   | Carnitine O-acetyltransferase (CRAT)                                           | 0.02    | Increased |
| Q9P000                   | COMM domain-containing protein 9 (COMMD9)                                      | 0.01    | Increased |
| P14384                   | Carboxypeptidase M (CPM)                                                       | 0.04    | Increased |
| Q9NWW4                   | CXXC motif containing zinc binding protein (CZIB)                              | 0.03    | Increased |
| Q96LJ7                   | Dehydrogenase/reductase SDR family member 1 (DHRS1)                            | 0.04    | Increased |
| P09622                   | Dihydrolipoyl dehydrogenase, mitochondrial (DLD)                               | 0.04    | Increased |
| O15160                   | DNA-directed RNA polymerases I and III subunit RPAC1 (POLR1C)                  | 0.04    | Increased |
| P04844                   | Dolichyl-diphosphooligosaccharide—protein glycosyltransferase subunit 2 (RPN2) | 0.0001  | Decreased |
| Q96FJ2                   | Dynein light chain 2, cytoplasmic (DYNLL2)                                     | 0.05    | Increased |
| Q63HN8                   | E3 ubiquitin-protein ligase RNF213 (RNF213)                                    | 0.02    | Increased |
| Q9H4M9                   | EH domain-containing protein 1 (EHD1)                                          | 0.03    | Increased |

|        |                                                                               |        |           |
|--------|-------------------------------------------------------------------------------|--------|-----------|
| Q8IUD2 | ELKS/Rab6-interacting/CAST family member 1 (ERC1)                             | 0.04   | Increased |
| P13639 | Elongation factor 2 (EEF2)                                                    | 0.02   | Decreased |
| Q9UKM7 | Endoplasmic reticulum mannosyl-oligosaccharide 1 2-alpha-mannosidase (MAN1B1) | 0.02   | Increased |
| O43414 | ERI1 exoribonuclease 3 (ERI3)                                                 | 0.05   | Increased |
| Q8NBQ5 | Estradiol 17-beta-dehydrogenase 11 (HSD17B11)                                 | 0.01   | Increased |
| P23588 | Eukaryotic translation initiation factor 4B (EIF4B)                           | 0.04   | Increased |
| P42285 | Exosome RNA helicase MTR4 (MTREX)                                             | 0.04   | Decreased |
| Q16610 | Extracellular matrix protein 1 (ECM1)                                         | 0.04   | Increased |
| P35555 | Fibrillin-1 (FBN1)                                                            | 0.01   | Increased |
| Q8WUP2 | Filamin-binding LIM protein 1 (FBLIM1)                                        | 0.03   | Increased |
| P48506 | Glutamate--cysteine ligase catalytic subunit (GCLC)                           | 0.04   | Increased |
| P35754 | Glutaredoxin-1 (GLRX)                                                         | 0.0002 | Increased |
| P35573 | Glycogen debranching enzyme (AGL)                                             | 0.01   | Increased |
| Q8TBA6 | Golgin subfamily A member 5 (GOLGA5)                                          | 0.01   | Increased |
| Q96CP6 | GRAM domain-containing protein 1A (GRAMD1A)                                   | 0.01   | Increased |
| Q15477 | Helicase SKI2W (SKIV2L)                                                       | 0.04   | Increased |
| P52926 | High mobility group protein HMGI-C (HMGA2)                                    | 0.04   | Increased |
| P68431 | Histone H3.1 (HIST1H3A)                                                       | 0.04   | Decreased |
| Q71DI3 | Histone H3.2 (HIST2H3A)                                                       | 0.01   | Decreased |
| Q86X55 | Histone-arginine methyltransferase CARM1 (CARM1)                              | 0.03   | Increased |
| Q16543 | Hsp90 co-chaperone Cdc37 (CDC37)                                              | 0.04   | Decreased |
| Q16836 | Hydroxyacyl-coenzyme A dehydrogenase, mitochondrial (HADH)                    | 0.04   | Increased |
| Q9UI26 | Importin-11 (IPO11)                                                           | 0.04   | Increased |
| Q15323 | Keratin, type I cuticular Ha1 (KRT31)                                         | 0.05   | Increased |
| Q16850 | Lanosterol 14-alpha demethylase (CYP51A1)                                     | 0.05   | Decreased |
| P46379 | Large proline-rich protein BAG6 (BAG6)                                        | 0.01   | Decreased |
| Q14847 | LIM and SH3 domain protein 1 (LASP1)                                          | 0.01   | Decreased |
| Q86W92 | Liprin-beta-1 (PPFIBP1)                                                       | 0.01   | Increased |
| P36776 | Lon protease homolog, mitochondrial (LONP1)                                   | 0.0003 | Decreased |
| P38571 | Lysosomal acid lipase/cholesteryl ester hydrolase (LIPA)                      | 0.003  | Increased |
| Q66K74 | Microtubule-associated protein 1S (MAP1S)                                     | 0.01   | Decreased |
| O95819 | Mitogen-activated protein kinase kinase kinase kinase 4 (MAP4K4)              | 0.04   | Increased |
| P35749 | Myosin-11 (MYH11)                                                             | 0.04   | Decreased |
| P19105 | Myosin regulatory light chain 12A (MYL12A)                                    | 0.01   | Increased |
| P48681 | Nestin (NES)                                                                  | 0.0001 | Increased |
| P19338 | Nucleolin (NCL)                                                               | 0.003  | Decreased |
| Q01085 | Nucleolysin TIAR (TIAL1)                                                      | 0.03   | Decreased |
| Q96EE3 | Nucleoporin SEH1 (SEH1L)                                                      | 0.05   | Increased |

|        |                                                                      |         |           |
|--------|----------------------------------------------------------------------|---------|-----------|
| Q96RS6 | NudC domain-containing protein 1 (NUDCD1)                            | 0.04    | Decreased |
| Q96CV9 | Optineurin (OPTN)                                                    | 0.03    | Increased |
| P20962 | Parathyrosin (PTMS)                                                  | 0.01    | Increased |
| Q96AY3 | Peptidyl-prolyl cis-trans isomerase FKBP10 (FKBP10)                  | 0.00001 | Decreased |
| Q99541 | Perilipin-2 (PLIN2)                                                  | 0.04    | Increased |
| Q14558 | Phosphoribosyl pyrophosphate synthase-associated protein 1 (PRPSAP1) | 0.02    | Decreased |
| Q86UU1 | Pleckstrin homology-like domain family B member 1 (PHLDB1)           | 0.04    | Increased |
| P15151 | Poliovirus receptor (PVR)                                            | 0.04    | Increased |
| Q9UUK3 | Poly [ADP-ribose] polymerase 4 (PARP4)                               | 0.02    | Increased |
| P51531 | Probable global transcription activator SNF2L2 (SMARCA2)             | 0.05    | Decreased |
| P07602 | Prosaposin (PSAP)                                                    | 0.02    | Decreased |
| P25788 | Proteasome subunit alpha type-3 (PSMA3)                              | 0.02    | Increased |
| Q8N8S7 | Protein enabled homolog (ENAH)                                       | 0.02    | Increased |
| Q9BRX2 | Protein pelota homolog (PELO)                                        | 0.01    | Increased |
| P29590 | Protein PML (PML)                                                    | 0.01    | Increased |
| Q99584 | Protein S100-A13 (S100A13)                                           | 0.02    | Decreased |
| Q9Y2Z0 | Protein SGT1 homolog (SUGT1)                                         | 0.04    | Decreased |
| P14618 | Pyruvate kinase PKM (PKM)                                            | 0.03    | Increased |
| Q9Y3P9 | Rab GTPase-activating protein 1 (RABGAP1)                            | 0.02    | Increased |
| P62820 | Ras-related protein Rab-1A (RAB1A)                                   | 0.03    | Decreased |
| P61006 | Ras-related protein Rab-8A (RAB8A)                                   | 0.03    | Increased |
| P11233 | Ras-related protein Ral-A (RALA)                                     | 0.03    | Increased |
| Q8N122 | Regulatory-associated protein of mTOR (RPTOR)                        | 0.02    | Increased |
| Q16799 | Reticulon-1 (RTN1)                                                   | 0.005   | Increased |
| Q52LW3 | Rho GTPase-activating protein 29 (ARHGAP29)                          | 0.001   | Increased |
| Q92974 | Rho guanine nucleotide exchange factor 2 (ARHGEF2)                   | 0.02    | Increased |
| Q15052 | Rho guanine nucleotide exchange factor 6 (ARHGEF6)                   | 0.03    | Increased |
| P08134 | Rho-related GTP-binding protein RhoC (RHOC)                          | 0.02    | Increased |
| O94804 | Serine/threonine-protein kinase 10 (STK10)                           | 0.03    | Increased |
| Q9H788 | SH2 domain-containing protein 4A (SH2D4A)                            | 0.02    | Increased |
| Q9Y512 | Sorting and assembly machinery component 50 homolog (SAMM50)         | 0.05    | Increased |
| Q12874 | Splicing factor 3A subunit 3 (SF3A3)                                 | 0.03    | Increased |
| Q8NBJ7 | Sulfatase-modifying factor 2 (SUMF2)                                 | 0.01    | Decreased |
| Q92922 | SWI/SNF complex subunit SMARCC1 (SMARCC1)                            | 0.01    | Increased |
| Q9UH65 | Switch-associated protein 70 (SWAP70)                                | 0.01    | Increased |
| Q9UMS6 | Synaptopodin-2 (SYNPO2)                                              | 0.01    | Increased |
| Q66K14 | TBC1 domain family member 9B (TBC1D9B)                               | 0.04    | Increased |

|        |                                                                               |       |           |
|--------|-------------------------------------------------------------------------------|-------|-----------|
| Q9NUJ3 | T-complex protein 11-like protein 1 (TCP11L1)                                 | 0.03  | Increased |
| Q9UGI8 | Testin (TES)                                                                  | 0.03  | Increased |
| Q5JTV8 | Torsin-1A-interacting protein 1 (TOR1AIP1)                                    | 0.01  | Increased |
| P37802 | Transgelin-2 (TAGLN2)                                                         | 0.03  | Increased |
| Q99442 | Translocation protein SEC62 (SEC62)                                           | 0.03  | Increased |
| Q15363 | Transmembrane emp24 domain-containing protein 2 (TMED2)                       | 0.02  | Decreased |
| P07951 | Tropomyosin beta chain (TPM2)                                                 | 0.05  | Increased |
| Q15628 | Tumor necrosis factor receptor type 1-associated DEATH domain protein (TRADD) | 0.02  | Increased |
| P78324 | Tyrosine-protein phosphatase non-receptor type substrate 1 (SIRPA)            | 0.04  | Increased |
| Q14376 | UDP-glucose 4-epimerase (GALE)                                                | 0.05  | Increased |
| P15374 | Ubiquitin carboxyl-terminal hydrolase isozyme L3 (UCHL3)                      | 0.04  | Increased |
| O43795 | Unconventional myosin-Ib (MYO1B)                                              | 0.03  | Increased |
| Q9NP79 | Vacuolar protein sorting-associated protein VTA1 homolog (VTA1)               | 0.003 | Decreased |
| Q2TAY7 | WD40 repeat-containing protein SMU1 (SMU1)                                    | 0.03  | Decreased |

*Abbreviations:* PHC, polycystic human cholangiocytes; shRNA, short hairpin RNA; UBE2I, Ubiquitin conjugating enzyme E2 I.

**Supplementary Table 6.** Differential SUMOylated proteins identified after SUMO1-IP in PHC compared to NHC.

| <b>UniProt Accession number</b> | <b>Protein</b>                                   | <b>p value</b> | <b>Abundance</b> |
|---------------------------------|--------------------------------------------------|----------------|------------------|
| P35998                          | 26S protease regulatory subunit 7 (PSMC2)        | 0.0054         | Increased        |
| P62241                          | 40S ribosomal protein S8 (RPS8)                  | 0.0495         | Decreased        |
| P26373                          | 60S ribosomal protein L13 (GN=RPL13)             | 0.0008         | Increased        |
| P18621                          | 60S ribosomal protein L17 (RPL17)                | 0.0150         | Increased        |
| P62424                          | 60S ribosomal protein L7a (RPL7A)                | 0.0014         | Increased        |
| P61158                          | Actin-related protein 3 (ACTR3)                  | 0.0097         | Increased        |
| Q12797                          | Aspartyl/asparaginyl beta-hydroxylase (ASPH)     | 0.0388         | Increased        |
| Q9Y696                          | Chloride intracellular channel protein 4 (CLIC4) | 0.0052         | Increased        |
| Q9Y678                          | Coatomer subunit gamma-1 (COPG1)                 | 0.0097         | Increased        |
| P60981                          | Dextrin (DSTN)                                   | 0.0043         | Decreased        |
| Q9UJU6                          | Drebrin-like protein (DBNL)                      | 0.0367         | Increased        |
| O60763                          | General vesicular transport factor p115 (USO1)   | 0.0015         | Increased        |
| P11413                          | Glucose-6-phosphate 1-dehydrogenase (G6PD)       | 0.0009         | Increased        |
| P00367                          | Glutamate dehydrogenase 1, mitochondrial (GLUD1) | 0.0496         | Increased        |
| P41250                          | Glycine--tRNA ligase (GARS)                      | 0.0472         | Increased        |
| P28799                          | Granulins (GRN)                                  | 0.0004         | Increased        |
| P62826                          | GTP-binding nuclear protein Ran (RAN)            | 0.0006         | Increased        |
| P04259                          | Keratin, type II cytoskeletal 6B (KRT6B)         | 0.00002        | Decreased        |
| Q9BS40                          | Latexin (LXN)                                    | 0.0253         | Increased        |
| P00387                          | NADH-cytochrome b5 reductase 3 (CYB5R3)          | 0.0008         | Increased        |
| P12273                          | Prolactin-inducible protein (PIP)                | 0.0436         | Increased        |
| Q32P28                          | Prolyl 3-hydroxylase 1 (P3H1)                    | 0.0416         | Increased        |
| P31151                          | Protein S100-A7 (S100A7)                         | 0.0005         | Decreased        |
| P46060                          | Ran GTPase-activating protein 1 (RANGAP1)        | 0.0002         | Increased        |
| Q9H0U4                          | Ras-related protein Rab-1B (RAB1B)               | 0.0227         | Increased        |
| Q9UJZ1                          | Stomatin-like protein 2, mitochondrial (STOML2)  | 0.0005         | Increased        |

*Abbreviations:* IP, immunoprecipitation; NHC, normal human cholangiocytes; PHC, polycystic human cholangiocytes.

**Supplementary Table 7.** Physical and serum biochemical parameters of the animals at sacrifice. Two months of SAME treatment with either (B) 50 mg/kg/day or (C) 100 mg/kg/day.

|                                             | <b>A</b>         | <b>B</b>                                      | <b>C</b>                                       |                             |                             |
|---------------------------------------------|------------------|-----------------------------------------------|------------------------------------------------|-----------------------------|-----------------------------|
| <b>Parameters (units)</b>                   | <b>PCK rats</b>  | <b>PCK Rats<br/>(50 mg SAME-<br/>treated)</b> | <b>PCK Rats<br/>(100 mg SAME-<br/>treated)</b> | <b>p value<br/>(A vs B)</b> | <b>p value<br/>(C vs A)</b> |
| <b>Body weight (g)</b>                      | 402.4<br>± 30.78 | 384.9 ± 81.62                                 | 402.9 ± 34.88                                  | 0.393                       | 0.684                       |
| <b>Kidney weight (g)</b>                    | 2.47 ±<br>0.17   | 2.43 ±<br>0.14                                | 2.60 ±<br>0.17                                 | 0.854                       | 0.591                       |
| <b>Kidney/body weight (%)</b>               | 0.62 ±<br>0.01   | 0.64 ±<br>0.02                                | 0.67 ±<br>0.05                                 | 0.401                       | 0.347                       |
| <b>Bile flow (µl/min/g)</b>                 | 0.029 ±<br>0.006 | 0.031 ±<br>0.008                              | 0.022 ±<br>0.003                               | 0.435                       | 0.166                       |
| <b>Alkaline phosphatase<br/>(U/L)</b>       | 186.8 ±<br>14.99 | 182.0 ±<br>18.19                              | 196.8 ±<br>11.18                               | 0.841                       | 0.599                       |
| <b>Aspartate<br/>aminotransferase (U/L)</b> | 316.0 ±<br>32.91 | 332.4 ±<br>23.95                              | 241.2 ±<br>18.18                               | 0.591                       | 0.031**                     |
| <b>Alanine<br/>aminotransferase (U/L)</b>   | 46.00 ±<br>3.64  | 46.40 ±<br>1.71                               | 41.60 ±<br>2.47                                | 0.176                       | 0.361                       |
| <b>Total protein (g/dL)</b>                 | 6.08 ±<br>0.11   | 6.04 ±<br>0.19                                | 5.89 ±<br>0.16                                 | 0.885                       | 0.360                       |
| <b>Blood urea (mg/dL)</b>                   | 35.60 ±<br>1.11  | 32.80 ±<br>0.80                               | 38.00 ±<br>1.37                                | 0.028**                     | 0.189                       |

\* = significant; \* = one-tailed *t*-test.

Values as Mean + SEM. *Abbreviations:* SAME, S-adenosylmethionine



## References

- [1] **Erice O, Munoz-Garrido P**, Vaquero J, Perugorria MJ, Fernandez-Barrena MG, Saez E, et al. MicroRNA-506 promotes primary biliary cholangitis-like features in cholangiocytes and immune activation. *Hepatology* 2018;67:1420–40. <https://doi.org/10.1002/hep.29533>.
- [2] **Ward CJ**, Hogan MC, Rossetti S, Walker D, Sneddon T, Wang X, et al. The gene mutated in autosomal recessive polycystic kidney disease encodes a large, receptor-like protein. *Nat Genet* 2002;30:259–69. <https://doi.org/10.1038/ng833>.
- [3] **Mason SB**, Liang Y, Sinderson RM, Miller CA, Eggleston-Gulyas T, Crisler-Roberts R, et al. Disease Stage Characterization of Hepatorenal Fibrocystic Pathology in the PCK Rat Model of ARPKD. *Anat Rec Adv Integr Anat Evol Biol* 2010;293:1279–88. <https://doi.org/10.1002/ar.21166>.
- [4] **Masyuk T V.**, Huang BQ, Masyuk AI, Ritman EL, Torres VE, Wang X, et al. Biliary Dysgenesis in the PCK Rat, an Orthologous Model of Autosomal Recessive Polycystic Kidney Disease. *Am J Pathol* 2004;165:1719. [https://doi.org/10.1016/S0002-9440\(10\)63427-X](https://doi.org/10.1016/S0002-9440(10)63427-X).
- [5] **Masyuk T V**, Masyuk AI, Lorenzo Pisarello M, Howard BN, Huang BQ, Lee P-Y, et al. TGR5 contributes to hepatic cystogenesis in rodents with polycystic liver diseases through cyclic adenosine monophosphate/Gas signaling. *Hepatology* 2017;66:1197–218. <https://doi.org/10.1002/hep.29284>.
- [6] **Masyuk T V**, Radtke BN, Stroope AJ, Banales JM, Gradilone SA, Huang B, et al. Pasireotide is more effective than octreotide in reducing hepatorenal cystogenesis in rodents with polycystic kidney and liver

- diseases. *Hepatology* 2013;58:409–21. <https://doi.org/10.1002/hep.26140>.
- [7] **Masyuk T V.**, Masyuk AI, Torres VE, Harris PC, Larusso NF. Octreotide Inhibits Hepatic Cystogenesis in a Rodent Model of Polycystic Liver Disease by Reducing Cholangiocyte Adenosine 3',5'-Cyclic Monophosphate. *Gastroenterology* 2007;132:1104–16. <https://doi.org/10.1053/j.gastro.2006.12.039>.
- [8] **Lorenzo Pisarello M**, Masyuk TV, Gradilone SA, Masyuk AI, Ding JF, Lee P-Y, et al. Combination of a Histone Deacetylase 6 Inhibitor and a Somatostatin Receptor Agonist Synergistically Reduces Hepatorenal Cystogenesis in an Animal Model of Polycystic Liver Disease. *Am J Pathol* 2018;188. <https://doi.org/10.1016/j.ajpath.2017.12.016>.
- [9] **Wunsch E**, Raszeja-Wyszomirska J, Barbier O, Milkiewicz M, Krawczyk M, Milkiewicz P. Effect of S-adenosyl-L-methionine on liver biochemistry and quality of life in patients with primary biliary cholangitis treated with ursodeoxycholic acid. A prospective, open label pilot study. *J Gastrointest Liver Dis* 2018;27:273–9. <https://doi.org/10.15403/jgld.2014.1121.273.icz>.
- [10] **Mato JM**, Cámara J, Fernández de Paz J, Caballería L, Coll S, Caballero A, et al. S-adenosylmethionine in alcoholic liver cirrhosis: a randomized, placebo-controlled, double-blind, multicenter clinical trial. *J Hepatol* 1999;30:1081–9.
- [11] **Schneider CA**, Rasband WS, Eliceiri KW. NIH Image to ImageJ: 25 years of image analysis. *Nat Methods* 2012;9:671–5. <https://doi.org/10.1038/nmeth.2089>.
- [12] **Xiao Y**, Pollack D, Nieves E, Winchell A, Callaway M, Vigodner M. Can your protein be sumoylated? A quick summary and important tips to study

- SUMO-modified proteins. *Anal Biochem* 2015;477:95–7.  
<https://doi.org/10.1016/j.ab.2014.11.006>.
- [13] **Salter KD**, Roman RM, LaRusso NR, Fitz JG, Doctor RB. Modified Culture Conditions Enhance Expression of Differentiated Phenotypic Properties of Normal Rat Cholangiocytes. *Lab Invest* 2000;80:1775–8.  
<https://doi.org/10.1038/labinvest.3780187>.
- [14] **Wiśniewski JR**, Zougman A, Nagaraj N, Mann M. Universal sample preparation method for proteome analysis. *Nat Methods* 2009;6:359–62.  
<https://doi.org/10.1038/nmeth.1322>.
- [15] **Meier F**, Beck S, Grassl N, Lubeck M, Park MA, Raether O, et al. Parallel Accumulation–Serial Fragmentation (PASEF): Multiplying Sequencing Speed and Sensitivity by Synchronized Scans in a Trapped Ion Mobility Device. *J Proteome Res* 2015;14:5378–87.  
<https://doi.org/10.1021/acs.jproteome.5b00932>.
- [16] **Meier F**, Brunner A-D, Koch S, Koch H, Lubeck M, Krause M, et al. Online Parallel Accumulation–Serial Fragmentation (PASEF) with a Novel Trapped Ion Mobility Mass Spectrometer. *Mol Cell Proteomics* 2018;17:2534–45. <https://doi.org/10.1074/mcp.TIR118.000900>.
- [17] **Tyanova S**, Temu T, Sinitcyn P, Carlson A, Hein MY, Geiger T, et al. The Perseus computational platform for comprehensive analysis of (prote)omics data. *Nat Methods* 2016;13:731–40.  
<https://doi.org/10.1038/nmeth.3901>.
- [18] **Szklarczyk D**, Gable AL, Lyon D, Junge A, Wyder S, Huerta-Cepas J, et al. STRING v11: protein–protein association networks with increased coverage, supporting functional discovery in genome-wide experimental

datasets. *Nucleic Acids Res* 2019;47:D607--D613.

<https://doi.org/10.1093/nar/gky1131>.

- [19] **Huang DW**, Sherman BT, Lempicki RA. Systematic and integrative analysis of large gene lists using DAVID bioinformatics resources. *Nat Protoc* 2009;4:44–57. <https://doi.org/10.1038/nprot.2008.211>.
- [20] **Babicki S**, Arndt D, Marcu A, Liang Y, Grant JR, Maciejewski A, et al. Heatmapper: web-enabled heat mapping for all. *Nucleic Acids Res* 2016;44:W147-53. <https://doi.org/10.1093/nar/gkw419>.
- [21] **Perez-Riverol Y**, Csordas A, Bai J, Bernal-Llinares M, Hewapathirana S, Kundu DJ, et al. The PRIDE database and related tools and resources in 2019: improving support for quantification data. *Nucleic Acids Res* 2019;47:D442–50. <https://doi.org/10.1093/nar/gky1106>.
