# Supplementary material for: Targeting UBC9-mediated protein hyper-SUMOylation in cystic cholangiocytes halts polycystic liver disease in experimental models
Source: PubMed Central journal article supplement (PMC8157180; doi:10.1016/j.jhep.2020.09.010), 2020-09-17
Supplement: NIHMS1666894-supplement-Suppl_Material_2.pdf [file NIHMS1666894-supplement-Suppl_Material_2.pdf]

## Journal of Hepatology

### CTAT methods

Tables for a “Complete, Transparent, Accurate and Timely account” (CTAT) are now mandatory for all revised submissions. The aim is to enhance the reproducibility of methods.

- Only include the parts relevant to your study
- Refer to the CTAT in the main text as ‘Supplementary CTAT Table’
- Do not add subheadings
- Add as many rows as needed to include all information
- Only include one item per row

**If the CTAT form is not relevant to your study, please outline the reasons why:**

|  |
|--|
|  |
|--|

#### 1.1 Antibodies

| Name                                               | Citation                                           | Supplier       | Cat no.  | Clone no. |
|----------------------------------------------------|----------------------------------------------------|----------------|----------|-----------|
| Mouse monoclonal anti $\beta$ -actin               | Uribarri AD <i>et al.</i> Gut 2015.                | Sigma          | A5316    | AC-74     |
| Rabbit monoclonal anti-SUMO1                       | Yang, D <i>et al.</i> Blood 2003.                  | Abcam          | ab32058  | Y299      |
| Rabbit monoclonal anti-SUMO1 (BSA and Azide free)  | Not available                                      | Abcam          | ab219724 | Y299      |
| Rabbit monoclonal anti-UBC9                        | He, X <i>et al.</i> Nat Chem Biol 2017.            | Abcam          | ab75854  | EP2938Y   |
| Rabbit monoclonal anti-Ubiquitin                   | Zhang K <i>et al.</i> Nat Commun 2018.             | Abcam          | ab134953 | EPR8830   |
| Mouse monoclonal anti-p62                          |                                                    | Abcam          | ab56416  | X         |
| Mouse monoclonal anti-acetylated $\alpha$ -tubulin | Caballero-Camino FJ <i>et al.</i> Hepatology 2020. | Sigma-Aldrich  | T6793    | 6-11 B-1  |
| Rabbit monoclonal anti- $\alpha$ -tubulin          | Caballero-Camino FJ <i>et al.</i> Hepatology 2020. | Abcam          | ab52866  | EP1332Y   |
| Rabbit monoclonal IgG                              | Liu S <i>et al.</i> Tumour Biol 2014               | Abcam          | ab172730 | EPR25A    |
| Anti-mouse IgG, HRP-linked Antibody                | Uribarri AD <i>et al.</i> Gut 2015.                | Cell Signaling | #7076    | X         |
| Anti-rabbit IgG, HRP-linked Antibody               | Yang, D <i>et al.</i> Blood 2003.                  | Cell Signaling | #7074    | X         |

#### 1.2 Cell lines

| Name                                       | Citation                                                                         | Supplier | Cat no. | Passage no. | Authentication test method                               |
|--------------------------------------------|----------------------------------------------------------------------------------|----------|---------|-------------|----------------------------------------------------------|
| Normal Human Cholangiocytes (NHC)          | Uribarri AD <i>et al.</i> Gut 2015.<br>Banales JM <i>et al.</i> Hepatology 2012. | X        | X       | P4-P10      | Biliary markers expression (CK-7, CK-19, AQP, AE2, CFTR) |
| GANAB mutated human cholangiocytes (ADPKD) | Uribarri AD <i>et al.</i> Gut 2015.<br>Banales JM <i>et al.</i> Hepatology 2012. | X        | X       | P4-P10      | Biliary markers expression (CK-7, CK-19, AQP, AE2, CFTR) |

# JOURNAL OF HEPATOLOGY

|                                               |                                                       |   |   |         |                                                          |
|-----------------------------------------------|-------------------------------------------------------|---|---|---------|----------------------------------------------------------|
| Normal rat cholangiocytes (NRC)               | Vroman B <i>et al.</i> Laboratory Investigation 1996. | X | X | P19-P25 | Biliary markers expression (CK-7, CK-19, AQP, AE2, CFTR) |
| <i>Pkhd1</i> mutated rat cholangiocytes (PCK) | Vroman B <i>et al.</i> Laboratory Investigation 1996. | X | X | P19-P25 | Biliary markers expression (CK-7, CK-19, AQP, AE2, CFTR) |

## 1.3 Organisms

| Name                | Citation                                                                                                          | Supplier                        | Strain                                       | Sex    | Age     | Overall n number |
|---------------------|-------------------------------------------------------------------------------------------------------------------|---------------------------------|----------------------------------------------|--------|---------|------------------|
| Sprague Dawley (SD) | Mason SB <i>et al.</i> The Anatomical Record 2011 Masyuk TV <i>et al.</i> The American Journal of pathology 2004. | Charles River Laboratories Inc. | Crl:CD(SD)                                   | Male   | 8 weeks | 4                |
| Sprague Dawley (SD) | Mason SB <i>et al.</i> The Anatomical Record 2011 Masyuk TV <i>et al.</i> The American Journal of pathology 2004. | Charles River Laboratories Inc. | Crl:CD(SD)                                   | Female | 8 weeks | 4                |
| PCK                 | Mason SB <i>et al.</i> The Anatomical Record 2011 Masyuk TV <i>et al.</i> The American Journal of pathology 2004. | Charles River Laboratories Inc. | PCK/CrljCrl- <i>Pkhd1<sup>pck</sup></i> /Crl | Male   | 8 weeks | 13               |
| PCK                 | Mason SB <i>et al.</i> The Anatomical Record 2011 Masyuk TV <i>et al.</i> The American Journal of pathology 2004. | Charles River Laboratories Inc. | PCK/CrljCrl- <i>Pkhd1<sup>pck</sup></i> /Crl | Female | 8 weeks | 13               |

## 1.4 Sequence based reagents

| Name         | Sequence                                                                        | Supplier      |
|--------------|---------------------------------------------------------------------------------|---------------|
| <i>ATF6</i>  | Forward: 5'-GCTGGATGAAGTTGTGTCAGAG-3'<br>Reverse: 5'-TGTTCCAACATGCTCATAGGTC-3'  | Sigma-Aldrich |
| <i>ATG5</i>  | Forward: 5'-CGTCCTGTGGCTGCAGATG-3'<br>Reverse: 5'-AAGGACAAACTTCTTTGAGGAGA-3'    | Sigma-Aldrich |
| <i>BAX</i>   | Forward: 5'-CCCAGAGGTCCTTTTCCGA-3'<br>Reverse: 5'-CCAGCCCATGATGGTTCTGAT-3'      | Sigma-Aldrich |
| <i>BECN1</i> | Forward: 5'-GATGGAAGGGTCTAAGACGTCCAA-3'<br>Reverse: 5'-TTTCGCCTGGGCTGTGGTAAG-3' | Sigma-Aldrich |
| <i>BIM</i>   | Forward: 5'-GCCCCTACCTCCCTACAGAC-3'                                             | Sigma-Aldrich |

|                            |                                                                                      |               |
|----------------------------|--------------------------------------------------------------------------------------|---------------|
|                            | Reverse: 5'-CCTTATGGAAGCCATTGCAC-3'                                                  |               |
| <i>CHOP</i>                | Forward: 5'-TCTTCATACATCACCACACC-3'<br>Reverse: 5'-CTTGTGACCTCTGCTGGTTC-3'           | Sigma-Aldrich |
| <i>DR5</i>                 | Forward: 5'-ACAGTTGCAGCCGTAGTCTTG-3'<br>Reverse: 5'-CCAGGTCGTTGTGAGCTTCT-3'          | Sigma-Aldrich |
| <i>GAPDH</i>               | Forward: 5'-CCAAGTCCATCCATGACAAC-3'<br>Reverse: 5'-TGTCATACCAGGAAATGAGC-3'           | Sigma-Aldrich |
| <i>GRP78</i>               | Forward: 5'-GAGCTGTGCAGAACTCCGGCG-3'<br>Reverse: 5'-ACCACCTGCTGAATCTTTGGAATTCGAGT-3' | Sigma-Aldrich |
| <i>IRE1α</i>               | Forward: 5'-AGGGACGAGGGAATCGTA-3'<br>Reverse: 5'-CAGTCCCTAATGCCACACCT-3'             | Sigma-Aldrich |
| <i>LC3B</i>                | Forward: 5'-GGTGAGAAGCAGCTTCCTGT-3'<br>Reverse: 5'-TCTCCTGGGAGGCATAGACC-3'           | Sigma-Aldrich |
| <i>MAT1A</i>               | Forward: 5'-GTTACATCGGAGTCTGTGG-3'<br>Reverse: 5'-GATGTGCTTGATGGTGTCC-3'             | Sigma-Aldrich |
| <i>MAT2A</i>               | Forward: 5'-GCTACGAGTAGAACGCTGTC-3'<br>Reverse: 5'-GCATCAGGATCCTGCTGAAG-3'           | Sigma-Aldrich |
| <i>MAT2B</i>               | Forward: 5'-CAGATGCTGCCTCTCAAC-3'<br>Reverse: 5'-GAACCTCTGCTGCCAGTG-3'               | Sigma-Aldrich |
| <i>SQSTM1/P62</i>          | Forward: 5'-TACGACTTGTGTAGCGTCTG-3'<br>Reverse: 5'-CGTGTTCACCTTCCGGAG-3'             | Sigma-Aldrich |
| <i>PERK</i>                | Forward: 5'-CAGGCAAAGGAAGGAGTCTG-3'<br>Reverse: 5'-AACAACTCAAAGCCACCAC-3'            | Sigma-Aldrich |
| <i>SAE1</i>                | Forward: 5'-CTTGCTGCTCCAGGGATGTC-3'<br>Reverse: 5'-GACCATCGTTGTCTCAGAAG-3'           | Sigma-Aldrich |
| <i>SOX9</i>                | Forward: 5'-GTACCCGCACTTGACAAC-3'<br>Reverse: 5'-TCGCTCTCGTTCAGAAGTCTC-3'            | Sigma-Aldrich |
| <i>SOX17</i>               | Forward: 5'-GTGGACCCGACGGAATTTG-3'<br>Reverse: 5'-GGAGATTCACACCGGAGTCA-3'            | Sigma-Aldrich |
| <i>SUMO1</i>               | Forward: 5'-CCGTCATCATGTCTGACC-3'<br>Reverse: 5'-GGAACACCCTGTCTTTGAC-3'              | Sigma-Aldrich |
| <i>UBA2</i>                | Forward: 5'-CGTTGCCTACCATGACAGC-3'<br>Reverse: 5'-GAGGAACATCAGCTGCCAG-3'             | Sigma-Aldrich |
| <i>Ubiquitin</i>           | Forward: 5'-CCTGAGGGGTGGCTGTTA-3'<br>Reverse: 5'-GCTACCATGCAACGAAACC-3'              | Sigma-Aldrich |
| <i>UBE2I</i>               | Forward: 5'-GGACTTTGAACATGTCGG-3'<br>Reverse: 5'-CCGAAGGGTACACATTCGG-3'              | Sigma-Aldrich |
| <i>s-XBP1</i>              | Forward: 5'-GCTGAGTCCGCAGCAGGT-3'<br>Reverse: 5'-CTGGGTCCAAGTTGTCCAGAAT-3'           | Sigma-Aldrich |
| <i>ZO-1</i>                | Forward: 5'-CGGTCCTCTGAGCCTGTAAG-3'<br>Reverse: 5'-GGATCTACATGCGACGACAA-3'           | Sigma-Aldrich |
|                            |                                                                                      |               |
| <i>α-Sma</i>               | Forward: 5'-CGCCATCAGGAACCTCGAGAAG-3'<br>Reverse: 5'-ATCATCACCAGCAAAGCCCG-3'         | Sigma-Aldrich |
| <i>Col1a1</i>              | Forward: 5'-GACTGTCCCAACCCCAA-3'<br>Reverse: 5'-CTTGGGTCCCTCGACTCCTA-3'              | Sigma-Aldrich |
| <i>Ctgf</i>                | Forward: 5'-CTAGCTGCCTACCGACTGGA-3'<br>Reverse: 5'-GCCCATCCCACAGGTCTTAG-3'           | Sigma-Aldrich |
| <i>Cxcl1 (IL8 homolog)</i> | Forward: 5'-ACTCAAGAATGGTCGCGAGG-3'<br>Reverse: 5'-ACGCCATCGGTGCAATCTAT-3'           | Sigma-Aldrich |
| <i>Gapdh</i>               | Forward: 5'-TGTGAACGGATTTGGCCGA-3'<br>Reverse: 5'-ATGAAGGGGTGCTTGTATGGC-3'           | Sigma-Aldrich |
| <i>Il6</i>                 | Forward: 5'-CATTCTGTCTCGAGCCCACC-3'<br>Reverse: 5'-GTCCCAAGGAAGGCAACTGG-3'           | Sigma-Aldrich |
| <i>Mat1a</i>               | Forward: 5'-CGAGAAGTGTGACACCATG-3'<br>Reverse: 5'-CATCCAGCACTGCATCAC-3'              | Sigma-Aldrich |
| <i>Mat2a</i>               | Forward: 5'-CACTTCAGAGTCTGTAGG-3'<br>Reverse: 5'-CCTGCACCAATGTCTTCCTC-3'             | Sigma-Aldrich |
| <i>Mat2b</i>               | Forward: 5'-GAGAAGGAGCTCTCCATCC-3'<br>Reverse: 5'-CAGCAGGTTCACTGTTCCG-3'             | Sigma-Aldrich |
| <i>Sae1</i>                | Forward: 5'-GTCGACCAGATCTGTACAG-3'<br>Reverse: 5'-CACTCCAGTCCACTGCTAG-3'             | Sigma-Aldrich |
| <i>Sumo1</i>               | Forward: 5'-GACAGCAGTGAGATCCAT-3'<br>Reverse: 5'-CTAAGAGATGGAGTGCCAG-3'              | Sigma-Aldrich |
| <i>Tgfβ1</i>               | Forward: 5'-CTGCTGACCCCCACTGATAC-3'<br>Reverse: 5'-GGAGATTCACACCGGAGTCA-3'           | Sigma-Aldrich |

|              |                                                                           |               |
|--------------|---------------------------------------------------------------------------|---------------|
| <i>Uba2</i>  | Forward: 5'-CCATGACAGCATCATGAACC-3'<br>Reverse: 5'-CTCTGTCAGGAGACACTTC-3' | Sigma-Aldrich |
| <i>Ube2i</i> | Forward: 5'-CGTGTATCCTTCTGGCAC-3'<br>Reverse: 5'-CTTCGCTTGTGCTCGAAC-3'    | Sigma-Aldrich |

## 1.5 Biological samples

| Description                                                                             | Source                                                        | Identifier      |
|-----------------------------------------------------------------------------------------|---------------------------------------------------------------|-----------------|
| Cystic wall biopsies from patients with ADPLD ( <i>PRKCSH</i> and <i>SEC63</i> mutated) | Radboud University Medical Center (Nijmegen, The Netherlands) | 2012/317        |
| Healthy human gallbladder biopsies obtained from metastatic colon cancer patients       | Donostia University Hospital (San Sebastian, Spain)           | MSA-MMR-2017-01 |
| Healthy human liver biopsies obtained from metastatic colon cancer patients             | Donostia University Hospital (San Sebastian, Spain)           | MSA-MMR-2017-01 |

## 1.6 Deposited data

| Name of repository | Identifier  | Link                                                                                      |
|--------------------|-------------|-------------------------------------------------------------------------------------------|
| DAVID              | DAVID 6.8   | <a href="https://david.ncifcrf.gov/summary.jsp">https://david.ncifcrf.gov/summary.jsp</a> |
| Heatmapper         | Heatmapper  | <a href="http://heatmapper.ca/">http://heatmapper.ca/</a>                                 |
| STRING             | STRING 11.0 | <a href="https://string-db.org/">https://string-db.org/</a>                               |

## 1.7 Software

| Software name            | Manufacturer                           | Version            |
|--------------------------|----------------------------------------|--------------------|
| Bio-Rad CFX Maestro™ 1.0 | Bio-Rad                                | 4.0.2325.0418      |
| Microsoft Excel for Mac  | Microsoft Corporation                  | 16.32              |
| Guava @ InCyte™          | Merck Millipore                        | 3.1.1              |
| i-control™               | Tecan                                  | 1.8                |
| NIS-Element AR           | Nikon                                  | 3.2                |
| Image J                  | National Institutes of Health-Bethesda | 1.50               |
| GraphPad Prism           | GraphPad Software, Inc.                | 8.3.0              |
| PEAKS Studio             | Bioinformatics Solutions Inc           | 8.5                |
| Proteome Discoverer      | Thermo Fisher                          | 1.4                |
| DataAnalysis             | Bruker                                 |                    |
| ZEN                      | Zeiss                                  | 3.2 (blue edition) |

## 1.8 Other (e.g. drugs, proteins, vectors etc.)

|                                                             |               |                |
|-------------------------------------------------------------|---------------|----------------|
| S-adenosyl-L-methionine disulfate p-toluenesulfonate (SAME) | Gnosis S.p.A. |                |
| MG132                                                       | Sigma Aldrich |                |
| UBE2I shRNA                                                 | Sigma Aldrich | TRCN0000329448 |
| Scramble shRNA                                              | Sigma Aldrich |                |

## 1.9 Please provide the details of the corresponding methods author for the manuscript:

|                                                                                                                                                                                                                                                                                                                                                                                                                                                                                                                                                                                                                                                                                           |
|-------------------------------------------------------------------------------------------------------------------------------------------------------------------------------------------------------------------------------------------------------------------------------------------------------------------------------------------------------------------------------------------------------------------------------------------------------------------------------------------------------------------------------------------------------------------------------------------------------------------------------------------------------------------------------------------|
| <p><b>Jesus M. Banales</b>, PhD, Department of Liver and Gastrointestinal Diseases, Biodonostia Health Research Institute – Donostia University Hospital, Paseo del Dr. Begiristain s/n, E-20014, San Sebastian, Spain. e-mail: <a href="mailto:jesus.banales@biodonostia.org">jesus.banales@biodonostia.org</a> / Phone: +34 943006067; Fax: +34 943006250</p> <p>or</p> <p><b>Joost P.H. Drenth</b>, M.D., Ph.D., Department of Gastroenterology and Hepatology, Radboud University Medical Center, PO Box 9101, 6500 HB Nijmegen, The Netherlands. E-mail: <a href="mailto:joost.drenth@radboudumc.nl">joost.drenth@radboudumc.nl</a> / Phone: +31 243616999; Fax: +31 24 363 5129</p> |
|-------------------------------------------------------------------------------------------------------------------------------------------------------------------------------------------------------------------------------------------------------------------------------------------------------------------------------------------------------------------------------------------------------------------------------------------------------------------------------------------------------------------------------------------------------------------------------------------------------------------------------------------------------------------------------------------|

**2.0 Please confirm for randomised controlled trials all versions of the clinical protocol are included in the submission. These will be published online as supplementary information.**
